# Supplementary material for: Synthesis of Mn3O4 nanozymes from structurally characterized phenoxazinone synthase models based on manganese(iii) Schiff base complexes
Source: Royal Society of Chemistry journal article supplement (doi:10.1039/d0dt00355g), 2020-01-01
Supplement: d0dt00355g1.pdf [file d0dt00355g1.pdf]

## Supporting Information

### Synthesis of $Mn_3O_4$ nanozymes from structurally characterized phenoxazinone synthase models based on manganese(III) Schiff base complexes

Arnab Mandal,<sup>a</sup> Sanchari Dasgupta,<sup>a</sup> Amit Adhikary,<sup>a</sup> Debabrata Samanta,<sup>b</sup> Ennio Zangrando,<sup>c</sup> and Debasis Das<sup>\*,a</sup>

<sup>a</sup> Department of Chemistry, University of Calcutta, 92, A. P. C. Road, Kolkata 700009, India. E-mail: [dasdebasis2001@yahoo.com](mailto:dasdebasis2001@yahoo.com)

<sup>b</sup> Department of Chemistry, Indian Institute of Technology, Kanpur, Kanpur-208016, India.

<sup>c</sup> Department of Chemical and Pharmaceutical Sciences, University of Trieste, Via L. Giorgieri 1, 34127 Trieste, Italy.

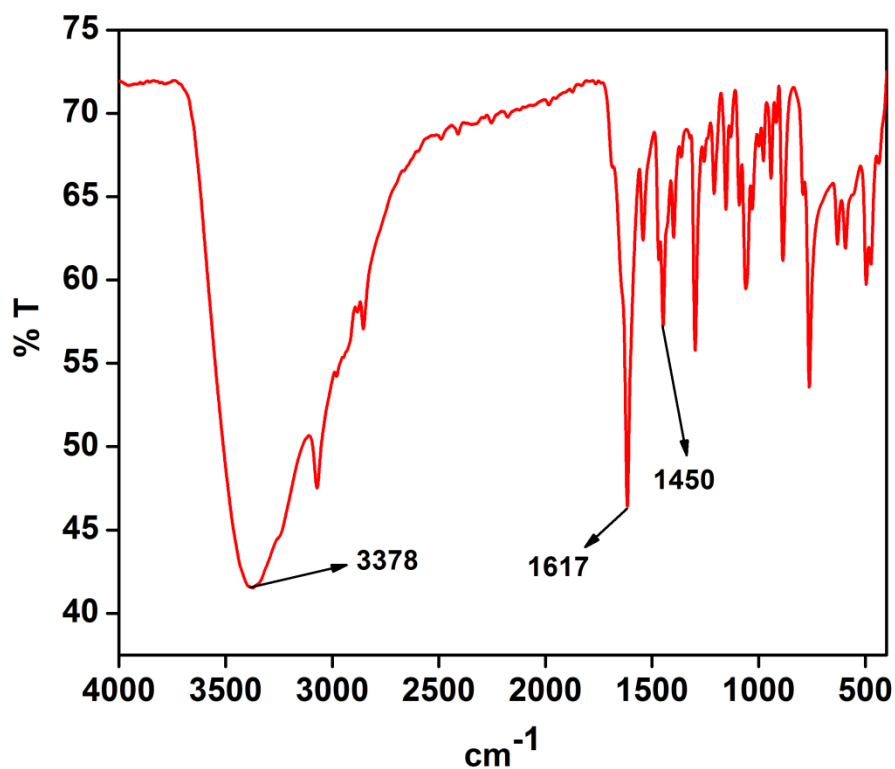

Fig. S1 FTIR spectrum of Complex 1.

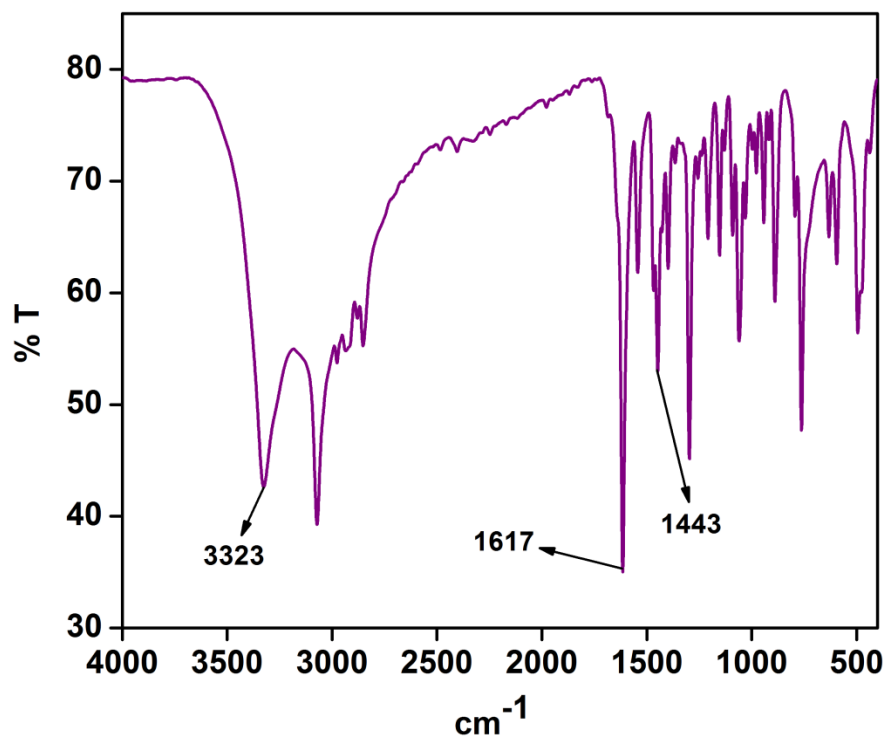

Fig. S2 FTIR spectrum of Complex 2.

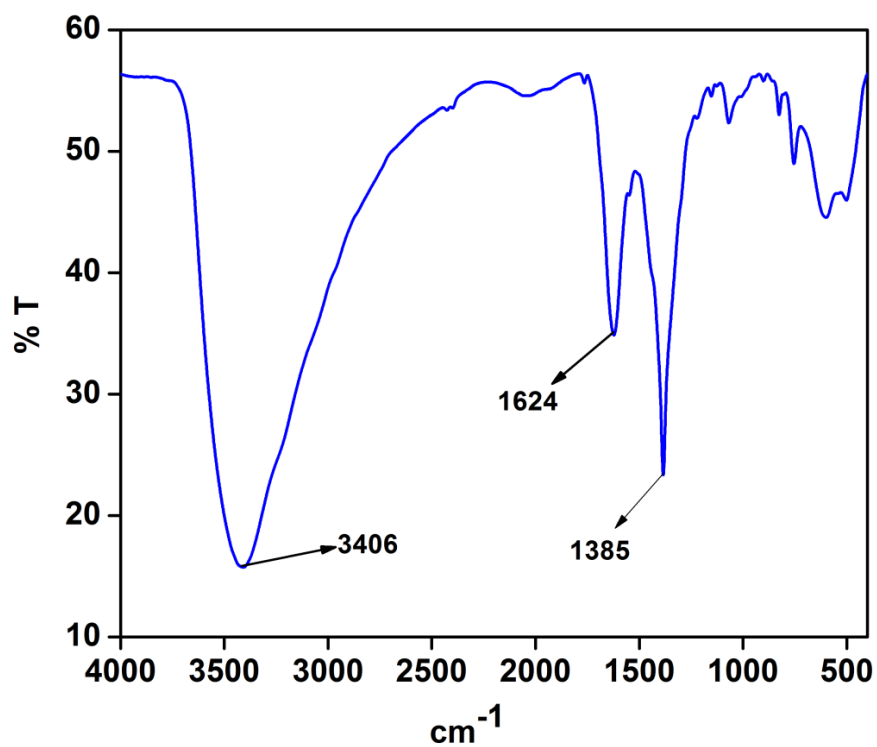

Fig. S3 FTIR spectrum of Complex 3

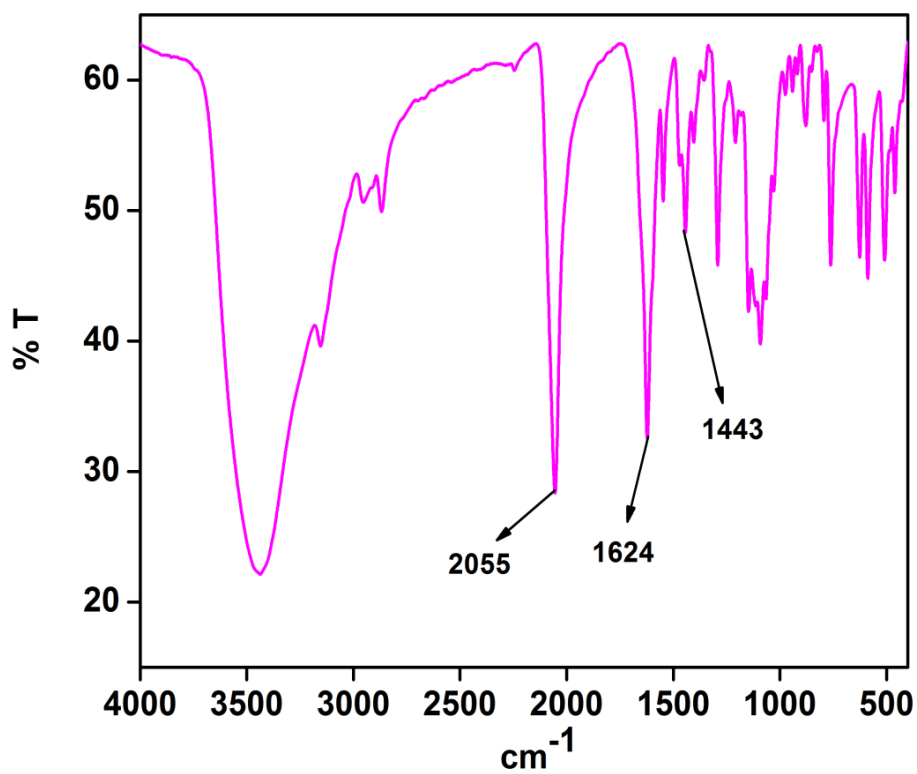

Fig. S4 FTIR spectrum of Complex 4.

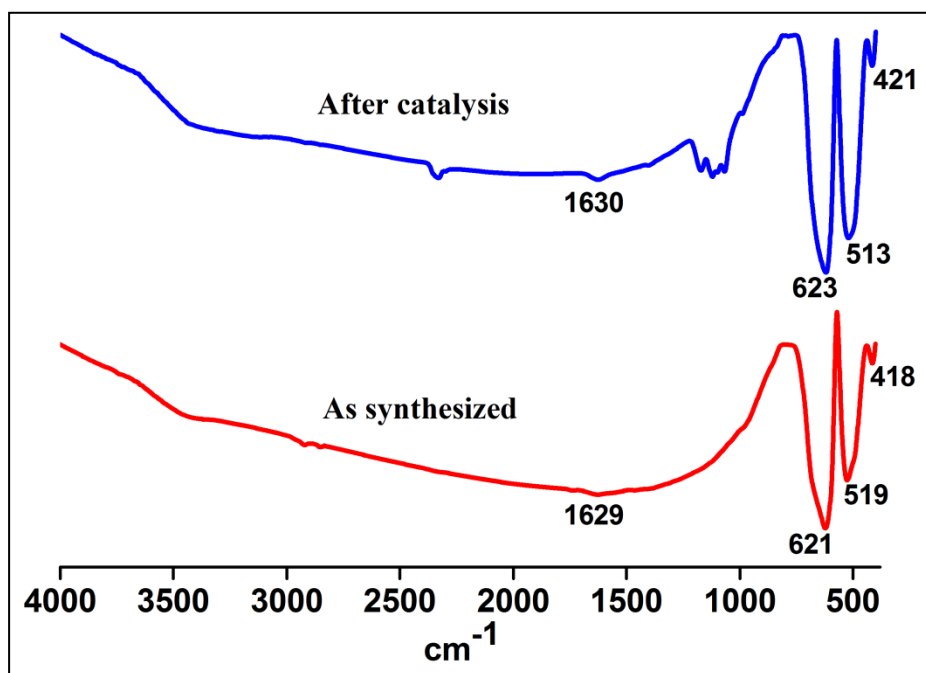

Fig. S5 FTIR spectrum of as synthesized, and after catalysis of cube shaped (Nc) Mn<sub>3</sub>O<sub>4</sub> NPs.

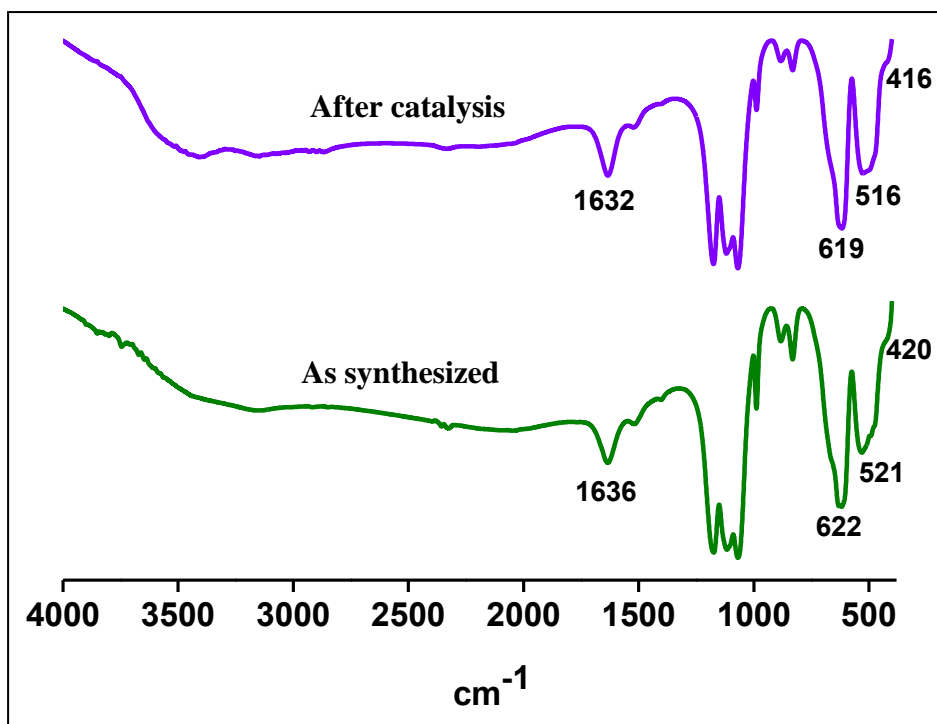

Fig. S6 FTIR spectrum of as synthesized, and after catalysis of needle (Nn) like  $\text{Mn}_3\text{O}_4$  NPs.

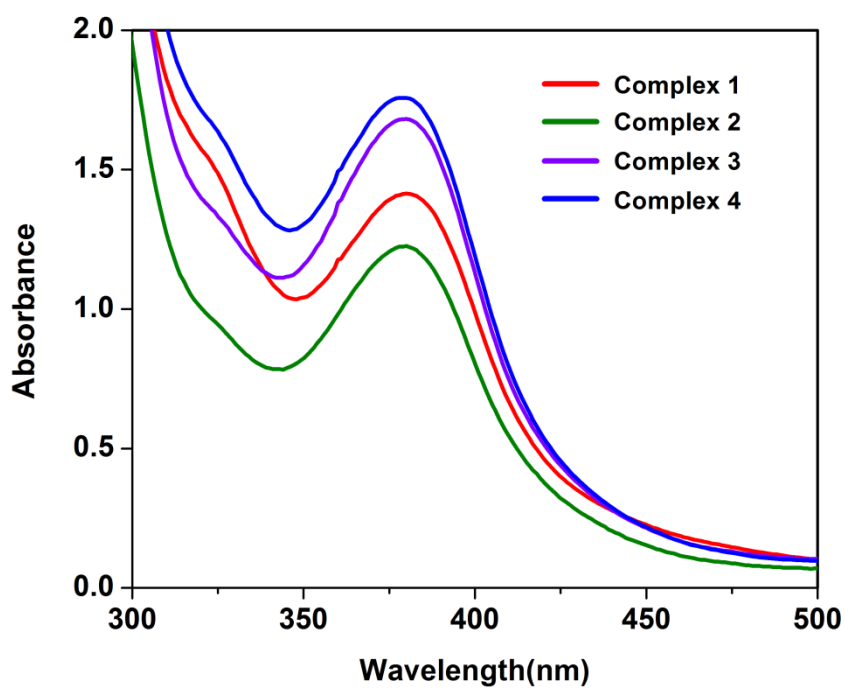

(a)

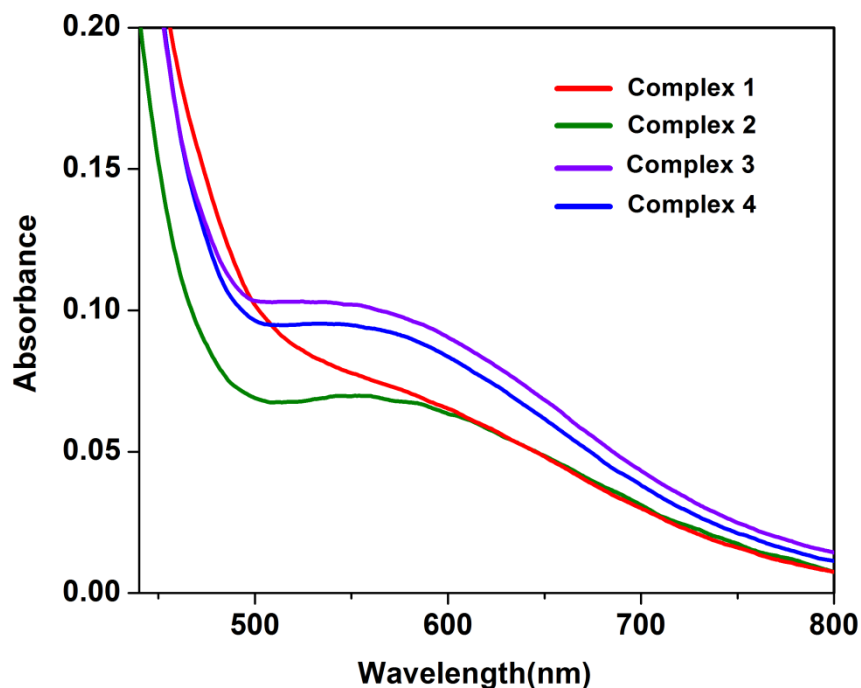

(b)

**Fig. S7** (a) charge transfer, (b) d-d transition of complexes **1-4** in DMF medium

**Table S1** Crystallographic data and details of refinement for complex **1, 3 & 4**

|                   | <b>1</b>                 | <b>3</b>               | <b>4</b>                         |
|-------------------|--------------------------|------------------------|----------------------------------|
| CCDC Number       | 1934500                  | 1934498                | 1934499                          |
| Empirical formula | $C_{12}H_{20}ClMnN_2O_4$ | $C_{12}H_{20}MnN_3O_7$ | $C_{39}H_{49}Mn_3N_9O_{6.75}S_3$ |
| Formula weight    | 346.69                   | 373.25                 | 1012.87                          |
| Crystal system    | Orthorhombic             | Orthorhombic           | Triclinic                        |
| Space group       | <i>Pbca</i>              | <i>Pbca</i>            | <i>P</i> $\bar{1}$               |
| <i>a</i> /Å       | 18.4286(4)               | 18.4749(4)             | 14.004(2)                        |
| <i>b</i> /Å       | 7.7670(2)                | 8.1865(2)              | 14.366(2)                        |
| <i>c</i> /Å       | 20.6985(5)               | 21.1388(5)             | 14.520(3)                        |
| $\alpha$ /°       | 90                       | 90                     | 67.61(3)                         |
| $\beta$ /°        | 90                       | 90                     | 61.177(17)                       |
| $\gamma$ /°       | 90                       | 90                     | 78.511(19)                       |

|                                                         |                                 |                                 |                                 |
|---------------------------------------------------------|---------------------------------|---------------------------------|---------------------------------|
| Volume/Å <sup>3</sup>                                   | 2962.68(12)                     | 3197.13(13)                     | 2365.9(9)                       |
| Density                                                 | 1.555                           | 1.551                           | 1.422                           |
| Z                                                       | 8                               | 8                               | 2                               |
| F(000)                                                  | 1440                            | 1552                            | 1046                            |
| $\mu_{\text{MoK}\alpha}/\text{mm}^{-1}$                 | 1.085                           | 0.865                           | 0.983                           |
| Mo K $\alpha$ radiation                                 | $\lambda=0.71073\text{\AA}$     | $\lambda=0.71073\text{\AA}$     | $\lambda=0.71073\text{\AA}$     |
| Temperature/K                                           | 296                             | 293                             | 295                             |
| $R_{\text{int}}$                                        | 0.0326                          | 0.0375                          | 0.1670                          |
| $\theta_{\text{min/max}}/^\circ$                        | 1.97/28.13                      | 2.89 / 26.03                    | 2.24 / 25.05                    |
| Reflections collected/<br>unique $[I>2\sigma(I)]^{[a]}$ | 3615/2911                       | 3132/ 2538                      | 8261/ 3159                      |
| GOF on $F^2$                                            | 1.043                           | 1.025                           | 0.983                           |
| $R_{\text{indices}}[I>2\sigma(I)]$                      | $RI = 0.0281$<br>$wR2 = 0.0672$ | $RI = 0.0435$<br>$wR2 = 0.1015$ | $RI = 0.0987$<br>$wR2 = 0.2290$ |

<sup>[a]</sup>  $R1 = \sum ||F_o| - |F_c|| / \sum |F_o|$ ,  $wR2 = [\sum w (F_o^2 - F_c^2)^2 / \sum w (F_o^2)^2]^{1/2}$

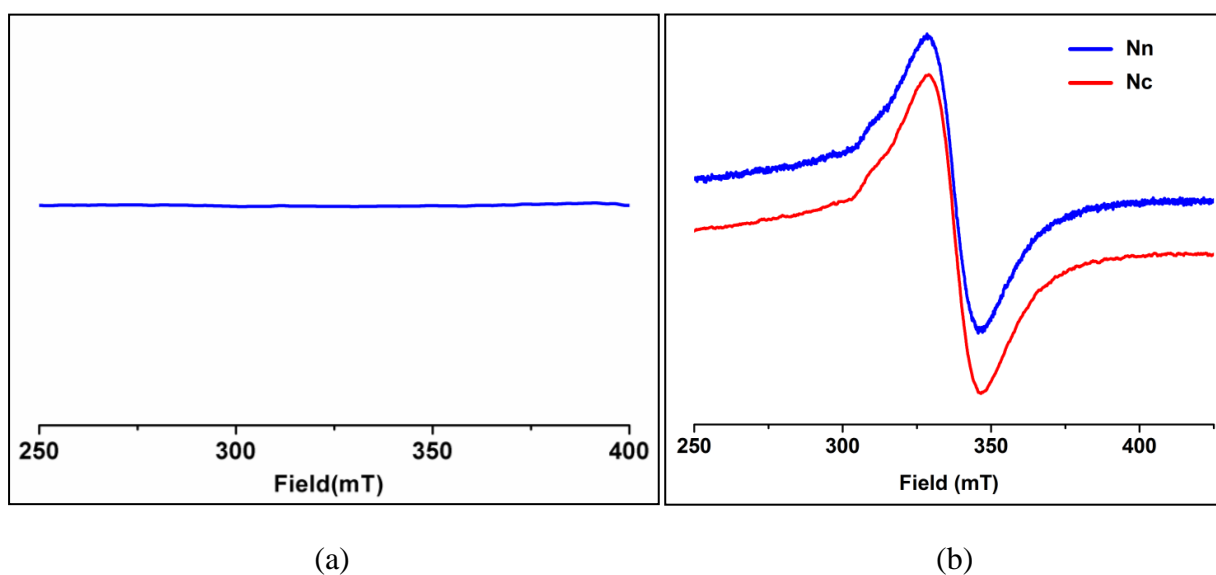

**Fig. S8** (a) ERP spectra of complex **4**, (b) Solid state EPR spectra of the synthesized Mn<sub>3</sub>O<sub>4</sub> NPs.

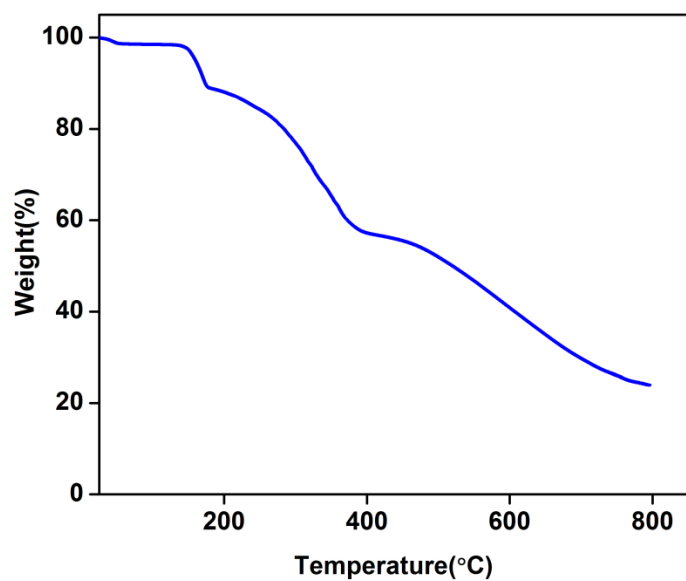

**Fig. S9** TGA curve of Complex **1** collected under N2 atmosphere.

Calculated residual mass % of  $Mn_3O_4 = (228.8117/3*346.6892)*100\%$   
 $= 21.99\%$  (experimentally obtained 23.34%)

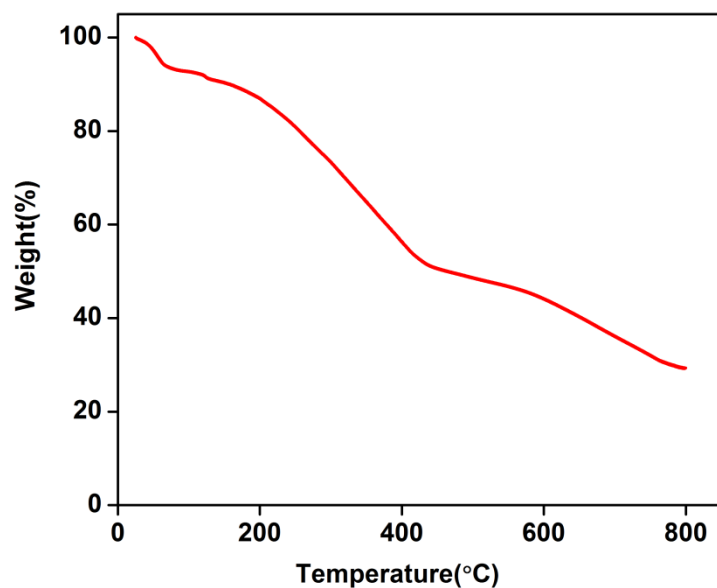

**Fig. S10** TGA curve of Complex **1** collected under N2 atmosphere.

Calculated residual mass % of  $Mn_3O_4 = (228.8117/3*333.2881)*100\%$   
 $= 22.87\%$  (experimentally obtained 26.12%)

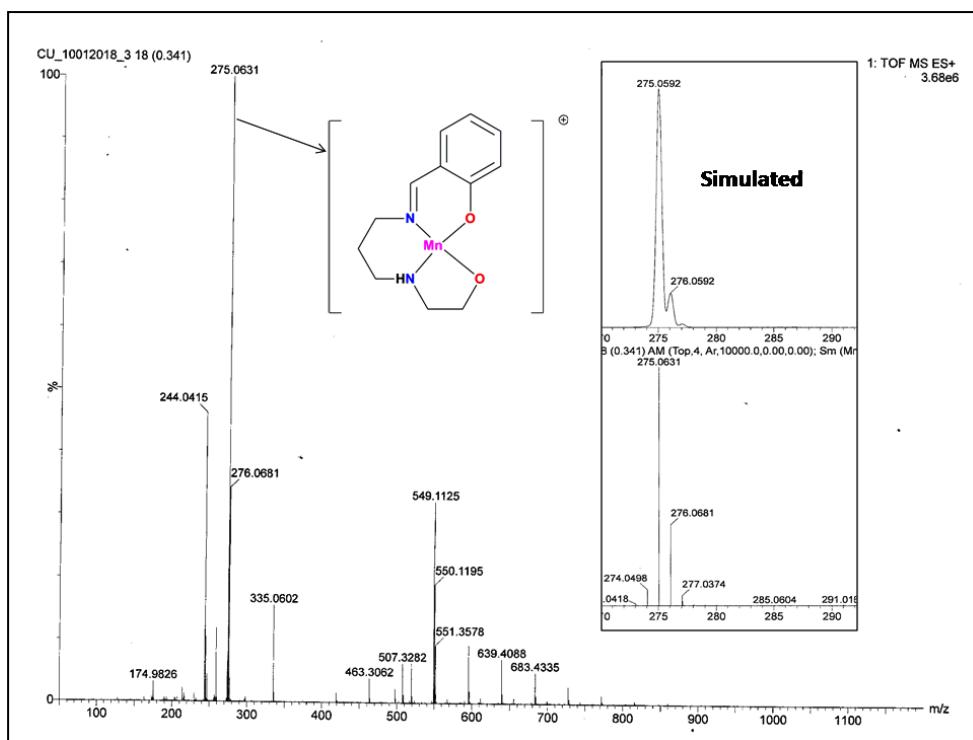

**Fig. S11** ESI-MS spectrum of Complex 1.

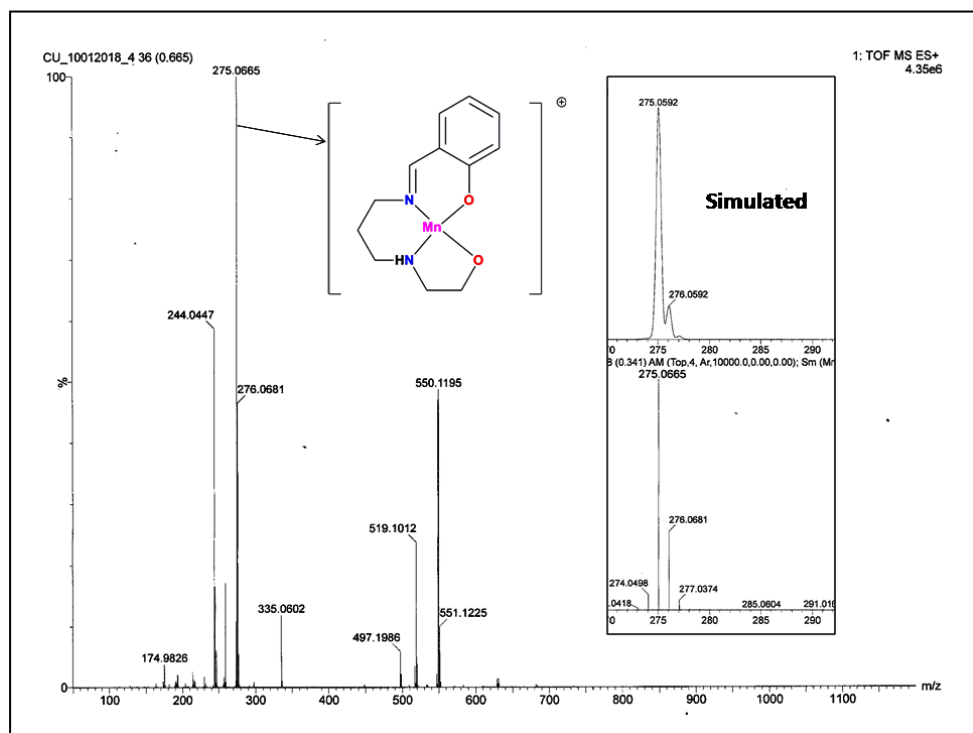

**Fig. S12** ESI-MS spectrum of Complex 2.



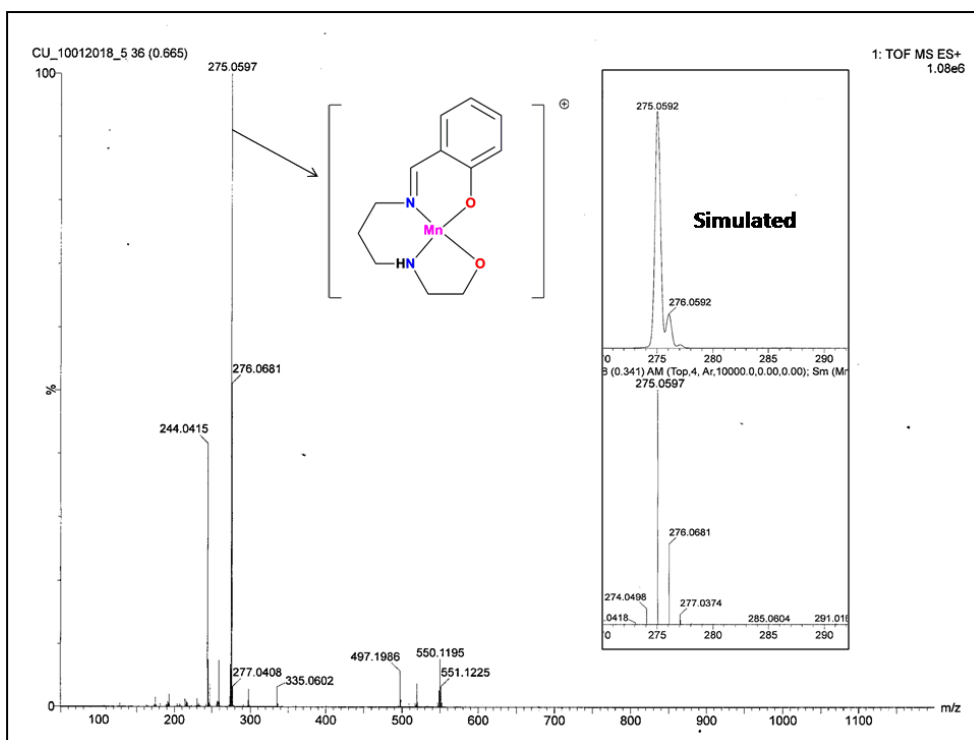

**Fig. S13** ESI-MS spectrum of Complex 3.

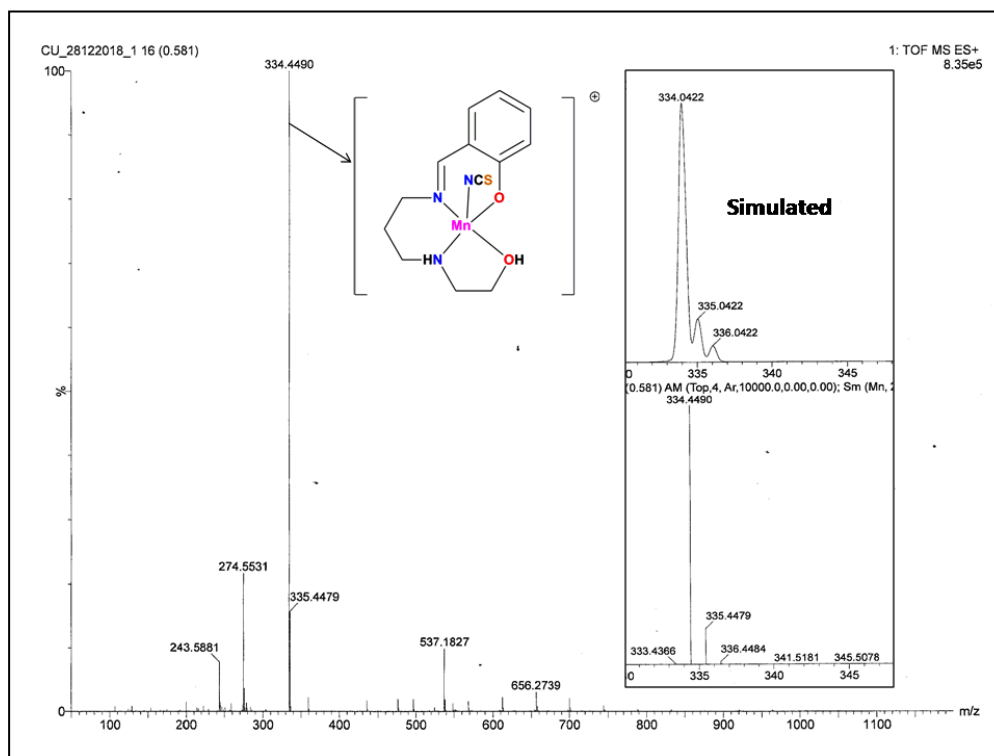

**Fig. S14** ESI-MS spectrum of Complex 4.

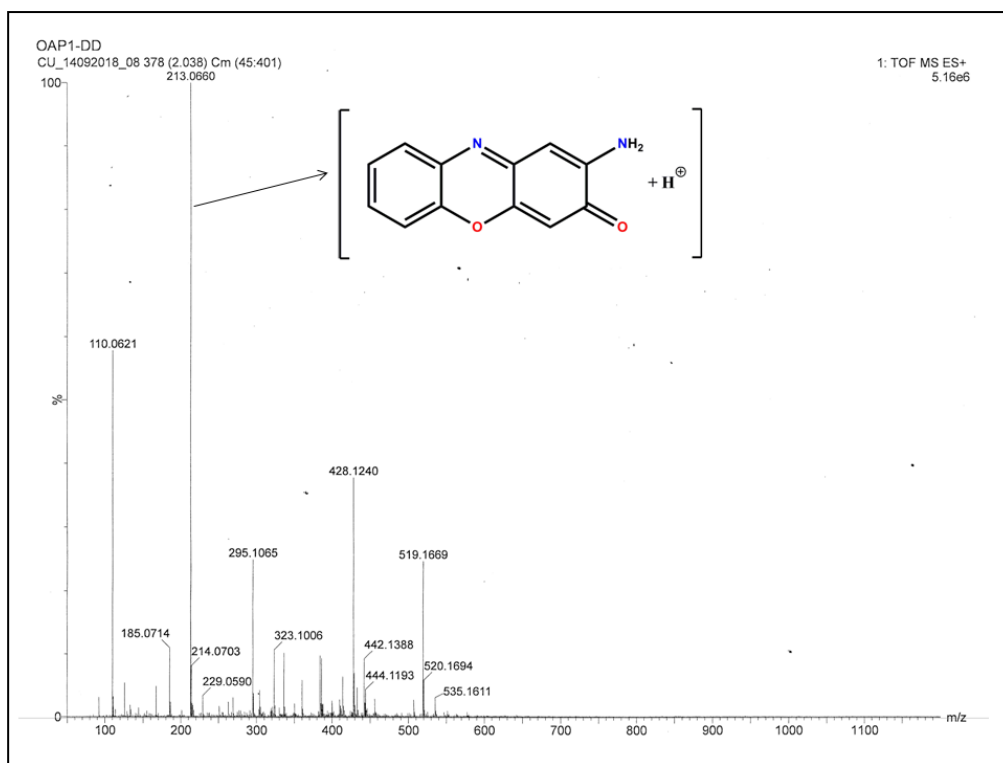

**Fig. S15** ESI-MS spectrum of APX.

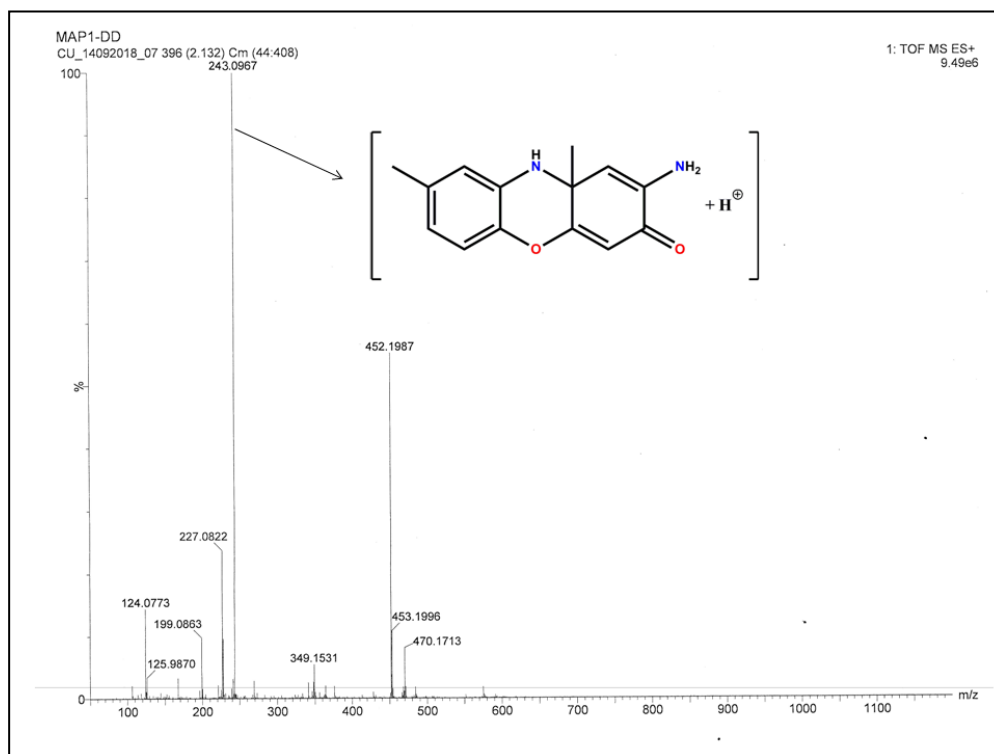

**Fig. S16** ESI-MS spectrum of MPX.

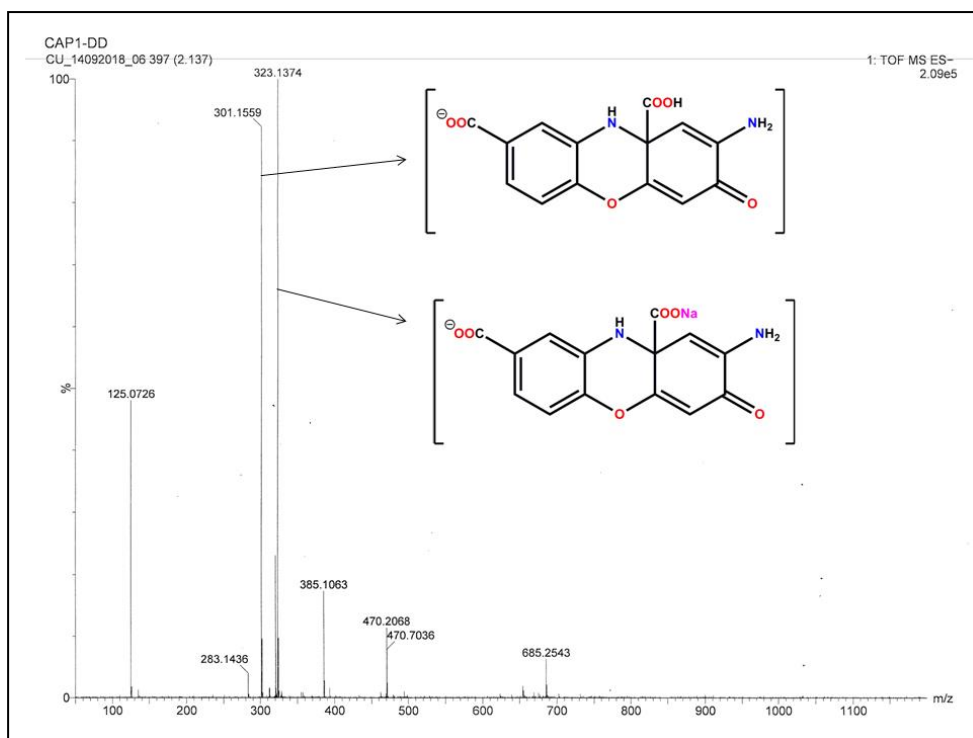

**Fig. S17** ESI-MS spectrum of CPX.

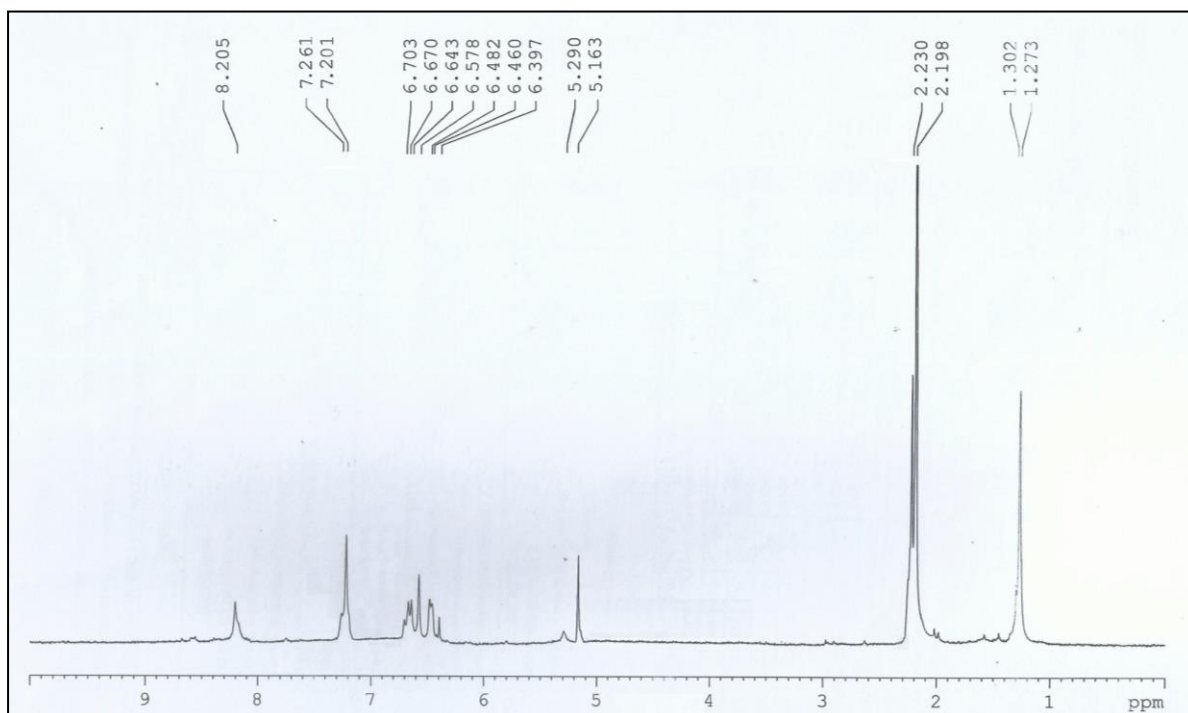

**Fig. S18**  $^1\text{H}$  NMR spectra of MPX in  $\text{CDCl}_3$ .

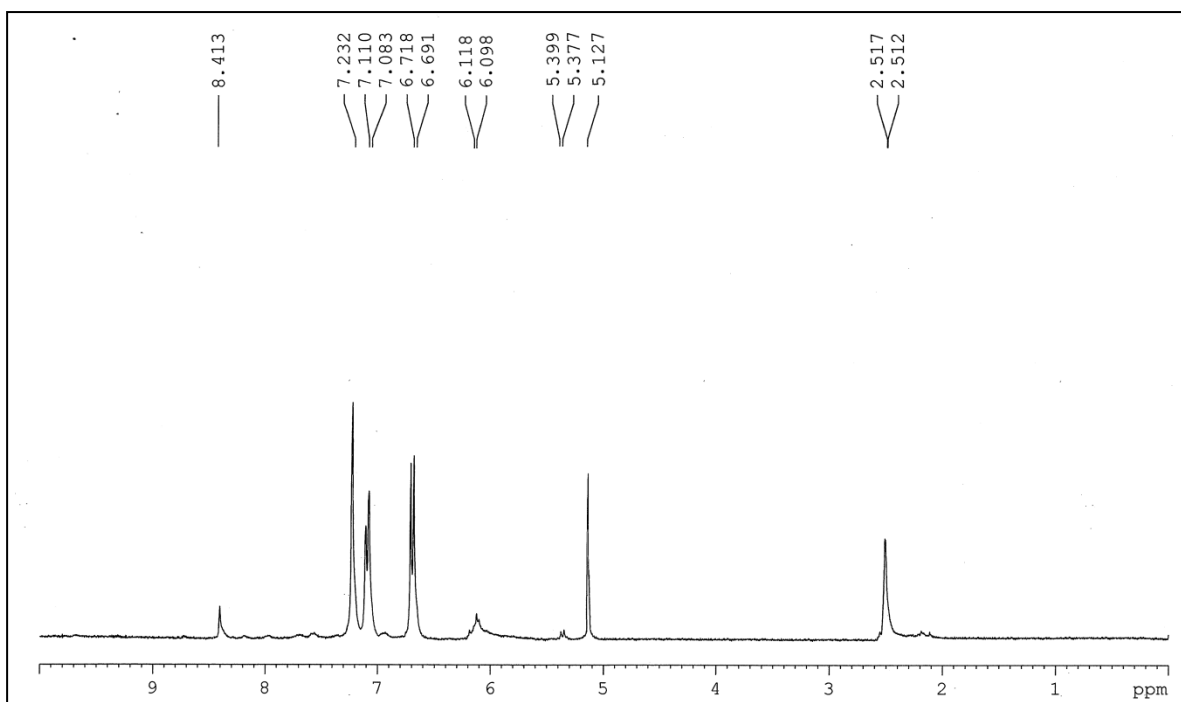

**Fig. S19**  $^1\text{H}$  NMR spectra of CPX in  $\text{DMSO-d}_6$ .

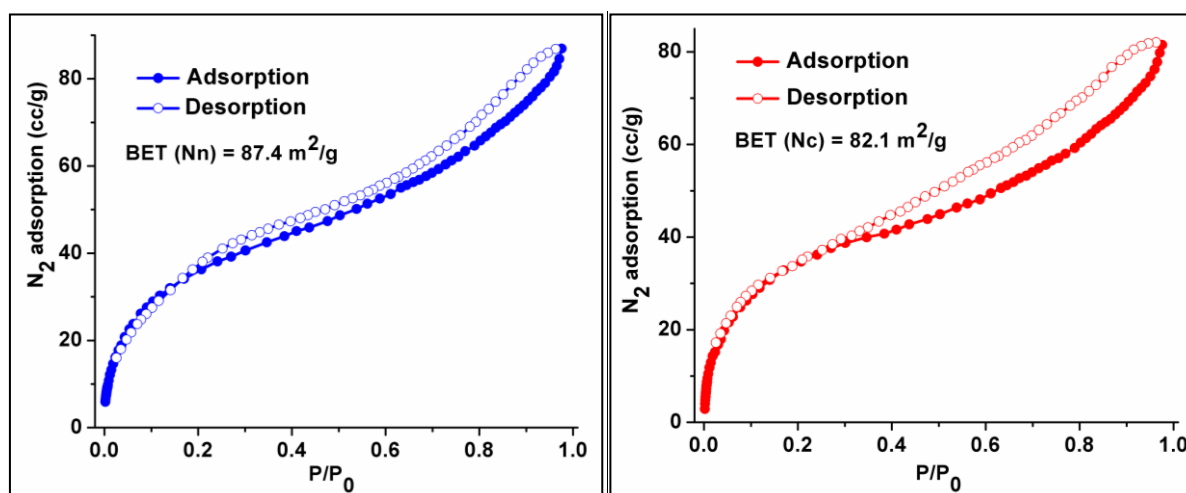

**Fig. S20** BET surface area analysis of the synthesized nanoparticles Nn & Nc

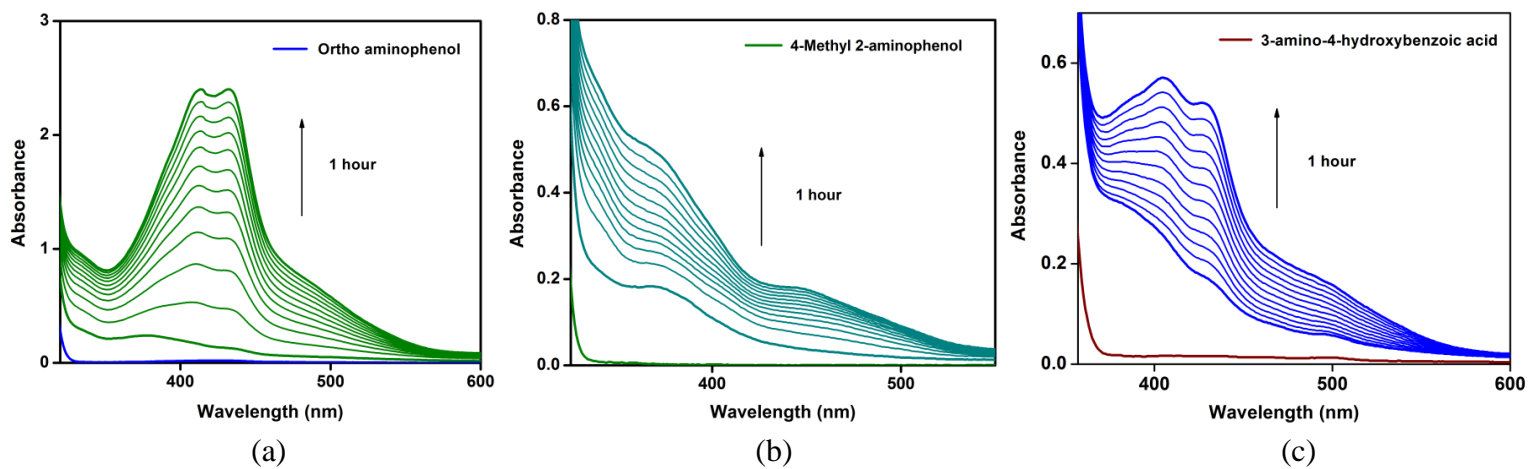

**Fig. S21** Catalytic oxidation of (a) OAP, (b) MAP and (c) CAP by complex **1** in DMF at room temperature. The spectra were recorded at a 5 min interval.

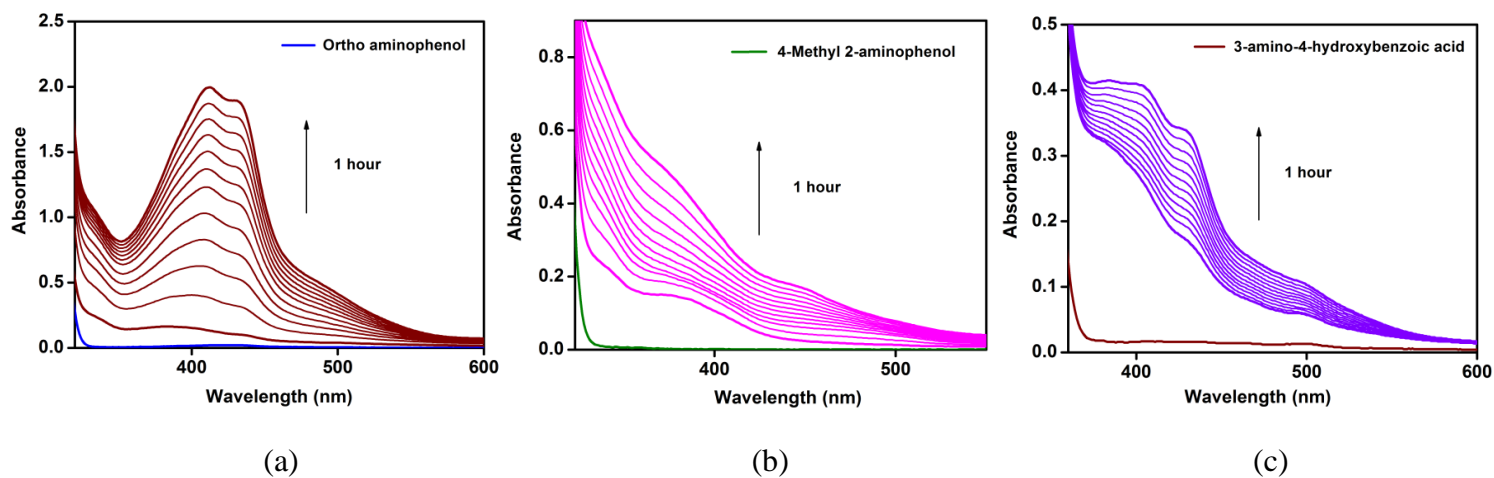

**Fig. S22** Catalytic oxidation of (a) OAP, (b) MAP and (c) CAP by complex **2** in DMF at room temperature. The spectra were recorded at a 5 min interval.

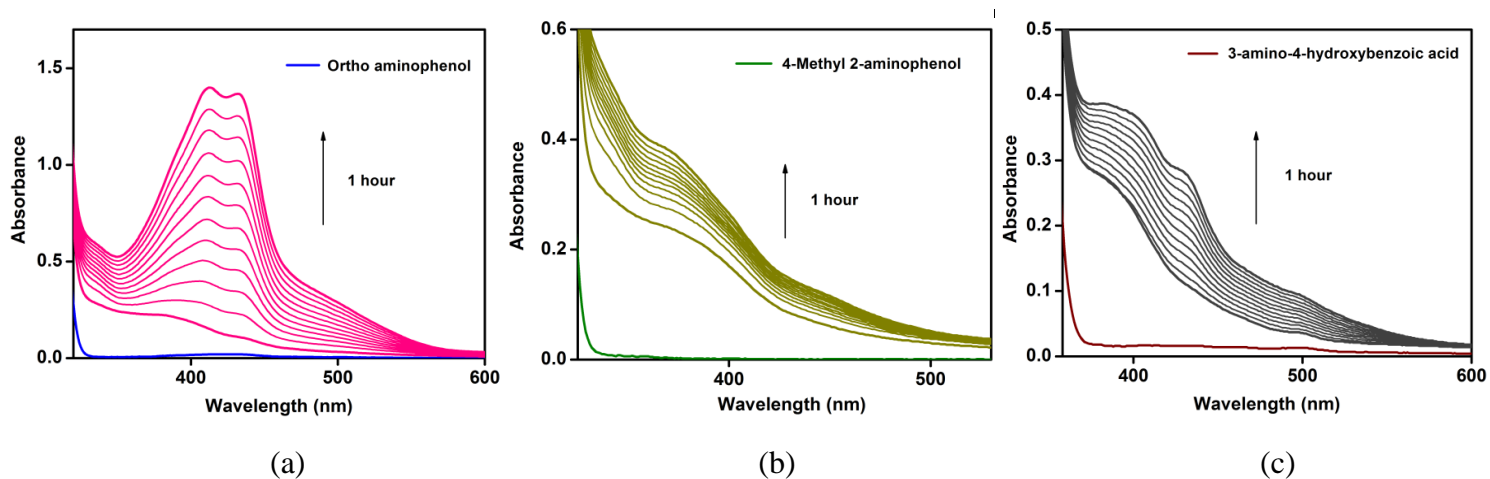

**Fig. S23** Catalytic oxidation of (a) OAP, (b) MAP and (c) CAP by complex **3** in DMF at room temperature. The spectra were recorded at a 5 min interval.

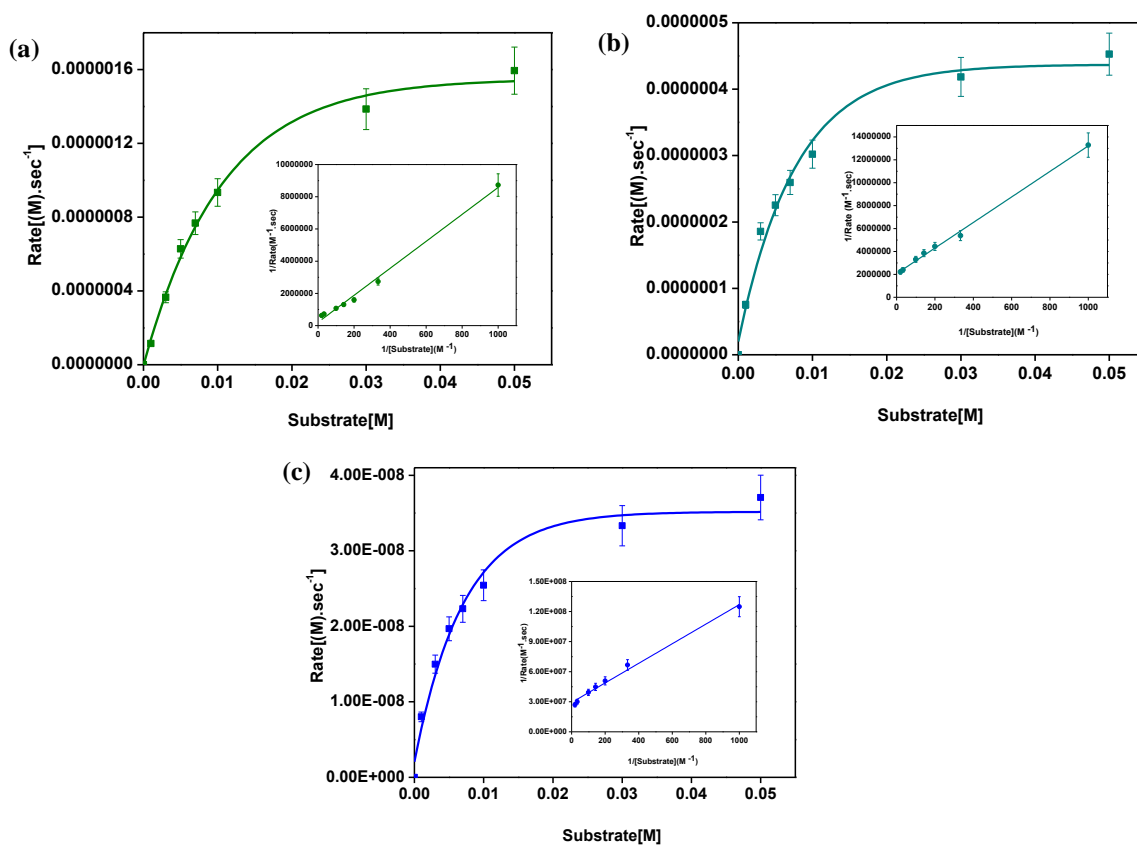

**Fig. S24** Plot of rate vs substrate concentration (insets: Lineweaver–Burk plot) of (a) OAP, (b) MAP and (c) CAP for complex **1**.

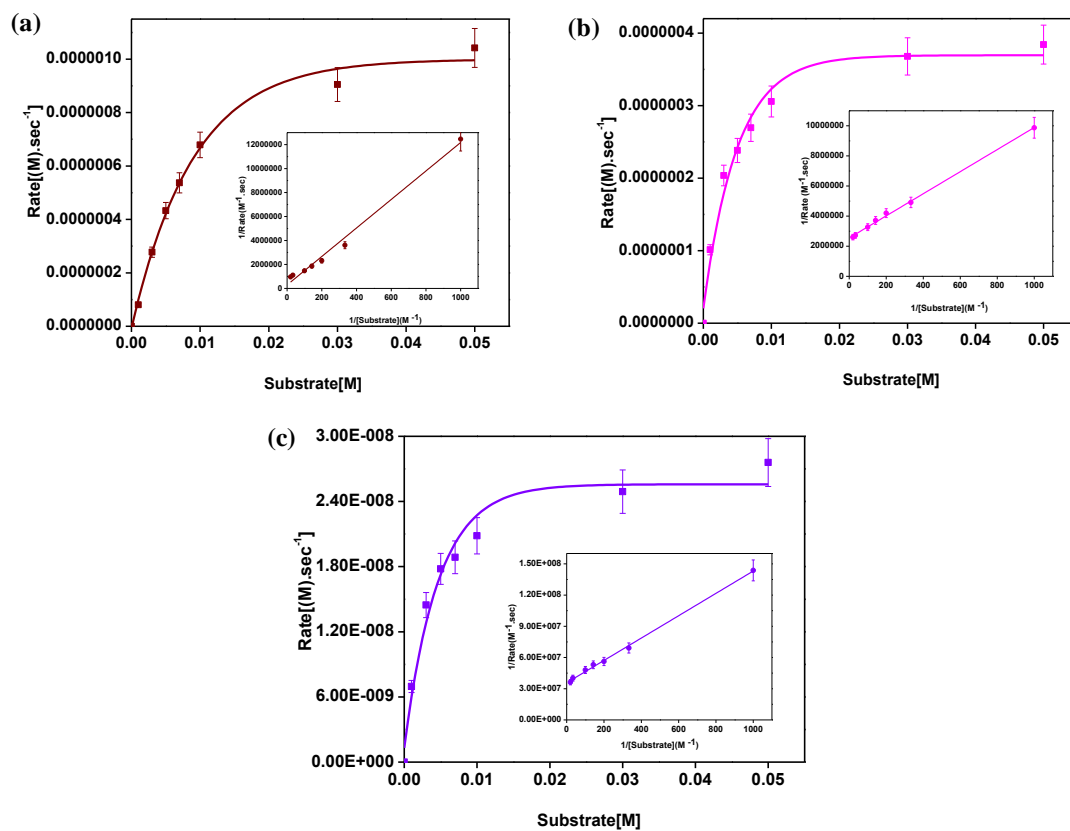

**Fig. S25** Plot of rate vs substrate concentration (insets: Lineweaver–Burk plot) of (a) OAP, (b) MAP and (c) CAP for complex **2**.

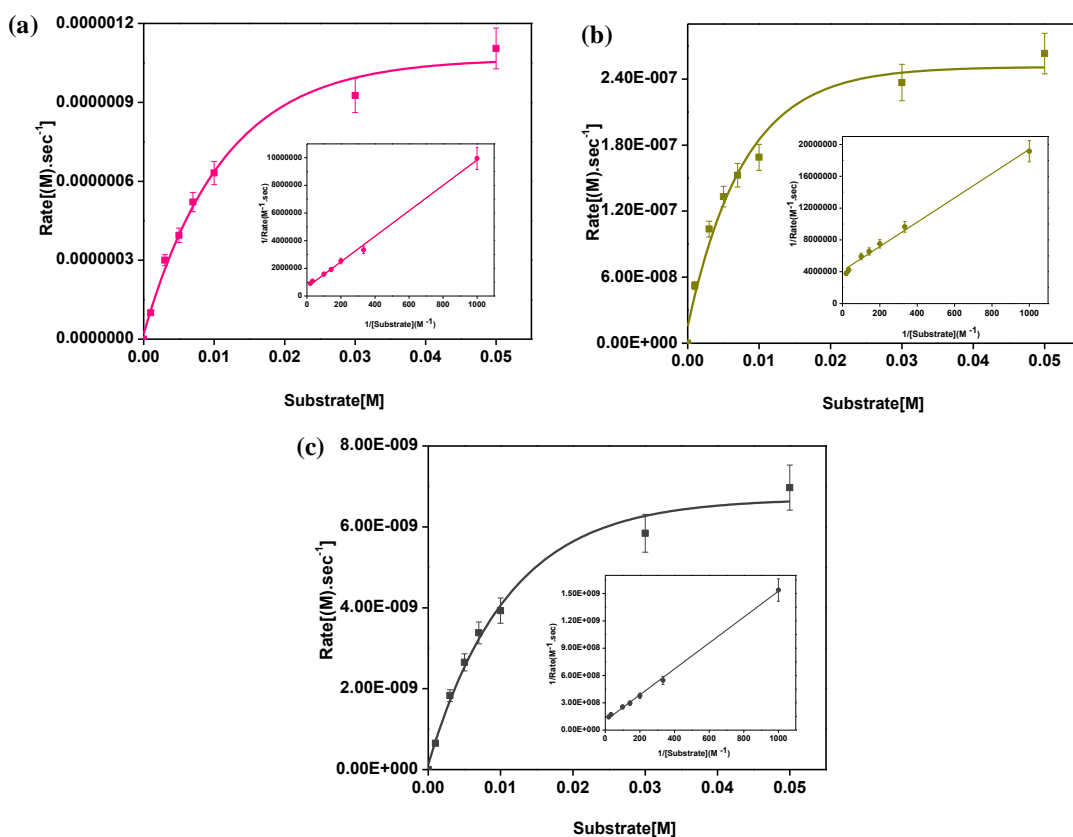

**Fig. S26** Plot of rate vs substrate concentration (insets: Lineweaver–Burk plot) of (a) OAP, (b) MAP and (c) CAP for complex **3**.

**Table S2** Bond distances (Å) and angles (°) for complexes **1** and **3**. DFT optimized data of complex **1** has also been reported.

| Complex         | <b>1</b>   |        | <b>3</b>   |
|-----------------|------------|--------|------------|
|                 | SCXRD      | DFT    |            |
| Mn(1)-O(1)      | 1.8754(11) | 1.935  | 1.8682(19) |
| Mn(1)-O(2)      | 1.8914(11) | 2.012  | 1.8837(19) |
| Mn(1)-N(1)      | 2.0121(13) | 2.051  | 2.009(2)   |
| Mn(1)-N(2)      | 2.0573(14) | 1.782  | 2.031(2)   |
| Mn(1)-O(3)      | 2.2615(13) | 2.070  | 2.298(2)   |
| Mn(1)-O(4)      | 2.2405(13) | 2.087  | 2.261(2)   |
|                 |            |        |            |
| O(1)-Mn(1)-O(2) | 91.95(5)   | 88.30  | 92.39(9)   |
| O(1)-Mn(1)-N(1) | 90.81(5)   | 90.15  | 90.71(9)   |
| O(2)-Mn(1)-N(1) | 177.00(5)  | 175.21 | 176.43(9)  |
| O(1)-Mn(1)-N(2) | 175.90(6)  | 173.80 | 175.18(10) |
| O(2)-Mn(1)-N(2) | 85.00(5)   | 85.63  | 83.97(9)   |
| N(1)-Mn(1)-N(2) | 92.18(6)   | 95.99  | 92.84(10)  |
| O(1)-Mn(1)-O(4) | 89.80(5)   | 85.18  | 91.19(9)   |
| O(2)-Mn(1)-O(4) | 93.63(5)   | 97.92  | 93.69(9)   |



|                 |           |        |           |
|-----------------|-----------|--------|-----------|
| N(1)-Mn(1)-O(4) | 87.55(5)  | 86.47  | 88.03(9)  |
| N(2)-Mn(1)-O(4) | 93.13(6)  | 94.38  | 92.19(9)  |
| O(1)-Mn(1)-O(3) | 89.30(5)  | 85.55  | 90.56(9)  |
| O(2)-Mn(1)-O(3) | 92.57(5)  | 73.99  | 91.16(8)  |
| N(1)-Mn(1)-O(3) | 86.28(5)  | 101.37 | 87.03(9)  |
| N(2)-Mn(1)-O(3) | 88.09(5)  | 93.99  | 86.37(9)  |
| O(4)-Mn(1)-O(3) | 173.76(5) | 167.87 | 174.78(8) |

**Table S3** Bond distances (Å) and angles (°) for complex **4**.

|            |           |            |          |             |          |
|------------|-----------|------------|----------|-------------|----------|
| Mn(1)-O(2) | 1.883(6)  | Mn(2)-O(4) | 1.876(6) | Mn(3)-O(6)  | 1.867(6) |
| Mn(1)-O(1) | 1.883(6)  | Mn(2)-O(3) | 1.890(6) | Mn(3)-O(5)  | 1.889(6) |
| Mn(1)-N(1) | 2.005(9)  | Mn(2)-N(3) | 1.990(8) | Mn(3)-N(6)  | 2.019(7) |
| Mn(1)-N(2) | 2.024(8)  | Mn(2)-N(4) | 2.031(7) | Mn(3)-N(5)  | 2.023(8) |
| Mn(1)-N(7) | 2.180(11) | Mn(2)-N(8) | 2.135(9) | Mn(3)-N(9)  | 2.143(9) |
| Mn(1)-O(4) | 2.675(6)  | Mn(2)-O(6) | 2.692(6) | Mn(3)-O(2') | 2.847(6) |

|                 |          |                 |          |                  |          |
|-----------------|----------|-----------------|----------|------------------|----------|
| O(2)-Mn(1)-O(1) | 91.8(3)  | O(4)-Mn(2)-O(3) | 92.1(3)  | O(6)-Mn(3)-O(5)  | 91.6(3)  |
| O(2)-Mn(1)-N(1) | 176.2(3) | O(4)-Mn(2)-N(3) | 173.7(3) | O(6)-Mn(3)-N(6)  | 86.0(3)  |
| O(1)-Mn(1)-N(1) | 90.5(3)  | O(3)-Mn(2)-N(3) | 90.3(3)  | O(5)-Mn(3)-N(6)  | 160.7(3) |
| O(2)-Mn(1)-N(2) | 85.5(3)  | O(4)-Mn(2)-N(4) | 85.6(3)  | O(6)-Mn(3)-N(5)  | 172.5(3) |
| O(1)-Mn(1)-N(2) | 164.2(3) | O(3)-Mn(2)-N(4) | 165.1(3) | O(5)-Mn(3)-N(5)  | 89.5(3)  |
| N(1)-Mn(1)-N(2) | 91.5(3)  | N(3)-Mn(2)-N(4) | 90.6(3)  | N(6)-Mn(3)-N(5)  | 90.6(3)  |
| O(2)-Mn(1)-N(7) | 95.2(3)  | O(4)-Mn(2)-N(8) | 95.9(3)  | O(6)-Mn(3)-N(9)  | 99.1(3)  |
| O(1)-Mn(1)-N(7) | 100.3(3) | O(3)-Mn(2)-N(8) | 100.5(3) | O(5)-Mn(3)-N(9)  | 101.0(3) |
| N(1)-Mn(1)-N(7) | 87.5(3)  | N(3)-Mn(2)-N(8) | 89.3(3)  | N(6)-Mn(3)-N(9)  | 98.2(3)  |
| N(2)-Mn(1)-N(7) | 95.4(3)  | N(4)-Mn(2)-N(8) | 94.3(3)  | N(5)-Mn(3)-N(9)  | 88.0(3)  |
| O(2)-Mn(1)-O(4) | 86.6(2)  | O(4)-Mn(2)-O(6) | 88.3(2)  | O(2')-Mn(3)-N(9) | 167.4(3) |
| O(1)-Mn(1)-O(4) | 87.1(2)  | O(3)-Mn(2)-O(6) | 88.9(2)  | O(2')-Mn(3)-O(5) | 89.1(2)  |
| N(1)-Mn(1)-O(4) | 90.4(3)  | N(3)-Mn(2)-O(6) | 85.9(3)  | O(2')-Mn(3)-O(6) | 88.0(2)  |
| N(2)-Mn(1)-O(4) | 77.2(3)  | N(4)-Mn(2)-O(6) | 76.3(2)  | O(2')-Mn(3)-N(5) | 84.6(3)  |
| N(7)-Mn(1)-O(4) | 172.2(3) | N(8)-Mn(2)-O(6) | 169.4(3) | O(2')-Mn(3)-N(6) | 71.8(3)  |

O2' atom at 1-x, 1-y, 2-z.

**Table S4** Hydrogen bond parameters (Å/°) for complexes **1**, **3** and **4**.

| Complex 1 |         |           |           |            |     |                  |
|-----------|---------|-----------|-----------|------------|-----|------------------|
| D-H       | d(D-H)  | d(H..A)   | <DHA      | d(D..A)    | A   | Symmetry code    |
| N2-H2a    | 0.82(2) | 2.52(2)   | 176.9(16) | 3.3421(15) | C11 | -                |
| O3-H3a    | 0.83(2) | 1.91(2)   | 169(2)    | 2.7267(17) | O2  | 1-x,-1/2+y,1/2-z |
| O3-H3b    | 0.82(2) | 2.270(19) | 172.2(18) | 3.0869(13) | C11 | -                |
| O4-H4a    | 0.81(2) | 2.36(2)   | 164(2)    | 3.1463(14) | C11 | x,1+y,z          |
| O4-H4b    | 0.81(2) | 1.94(2)   | 176(2)    | 2.7536(18) | O2  | 1-x,1/2+y,1/2-z  |
| Complex 3 |         |           |           |            |     |                  |

|                  |         |         |        |           |                  |                  |
|------------------|---------|---------|--------|-----------|------------------|------------------|
| N2-H2a           | 0.98    | 2.53    | 107    | 2.969(4)  | O3               | -                |
| N2-H2a           | 0.98    | 1.91    | 154    | 2.826(6)  | O11              | x,-1+y,z         |
| N2-H2a           | 0.98    | 2.10    | 173    | 3.080(8)  | O22 <sup>a</sup> | x,-1+y,z         |
| O3-H3a           | 0.86(3) | 1.88(3) | 165(3) | 2.716(3)  | O2               | 1-x,-1/2+y,1/2-z |
| O3-H3b           | 0.82(3) | 1.93(3) | 162(3) | 2.720(6)  | O10              | x,-1+y,z         |
| O3-H3b           | 0.82(3) | 2.14(3) | 154(3) | 2.898(9)  | O22 <sup>a</sup> | x,-1+y,z         |
| O4-H4a           | 0.84(3) | 1.92(3) | 173(3) | 2.760(3)  | O2               | 1-x,1/2+y,1/2-z  |
| O4-H4b           | 0.83(3) | 1.95(3) | 158(3) | 2.733(3)  | O10              | -                |
| O4-H4b           | 0.83(3) | 2.01(3) | 163(4) | 2.814(7)  | O20 <sup>a</sup> | -                |
| <b>Complex 4</b> |         |         |        |           |                  |                  |
| N2-H2a           | 0.98    | 2.02    | 165    | 2.981(11) | O3               | -                |
| N2-H2a           | 0.98    | 2.38    | 119    | 2.978(13) | O4               | -                |
| N4-H4a           | 0.98    | 2.06    | 165    | 3.022(10) | O5               | -                |
| N4-H4a           | 0.98    | 2.37    | 119    | 2.965(10) | O6               | -                |
| N6-H6a           | 0.98    | 2.11    | 161    | 3.050(10) | O1               | 1-x,1-y,2-z      |
| N6-H6a           | 0.98    | 2.28    | 123    | 2.930(12) | O2               | 1-x,1-y,2-z      |

<sup>a</sup> O20 and O22 in **3** represent disordered nitrate oxygen atoms.

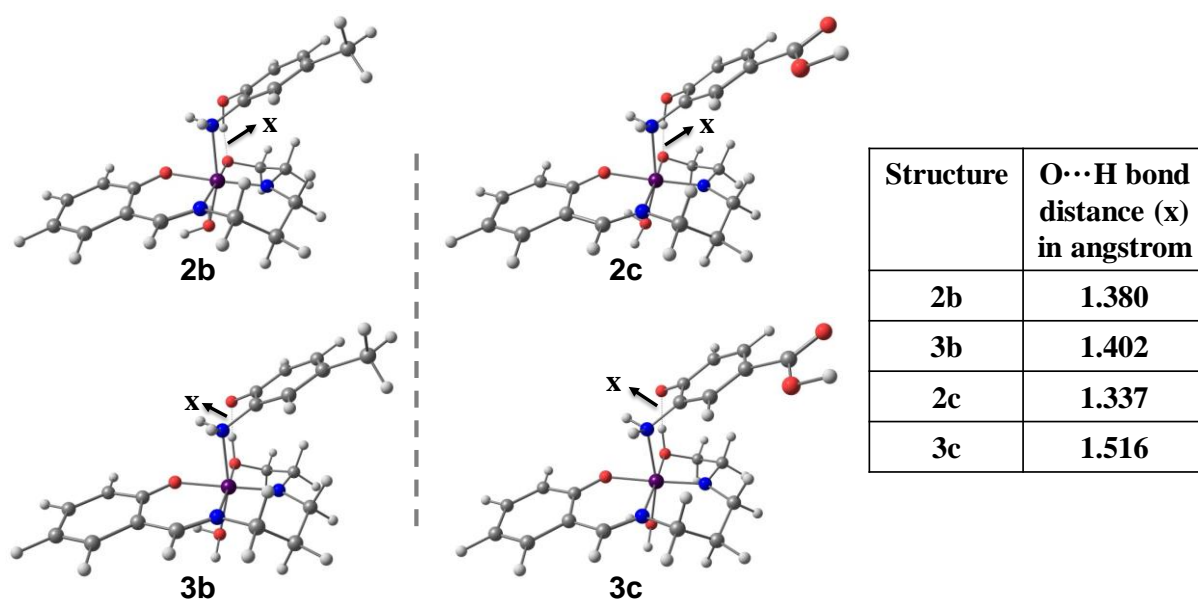

**Fig. S27** M06-2X/cc-PVTZ calculated structures of **2b**, **2c**, **3b** and **3c**. The O...H bond (x) distances are provided in Å.

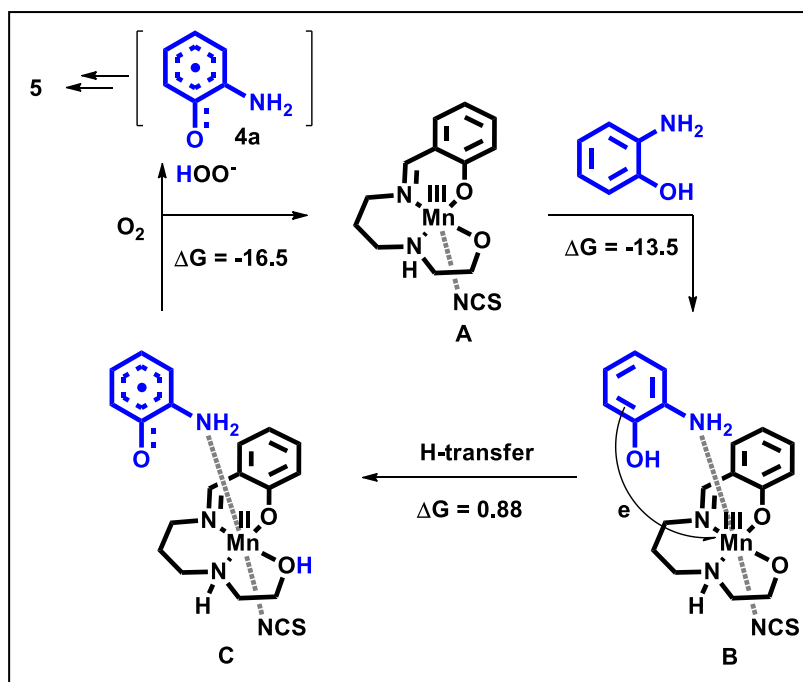

**Fig. S28** Proposed mechanism of phenoxazinone synthase activity exhibited by complex **4**. M06-2X/cc-PVTZ calculated free energies are provided in kcal/mol at 25 °C.

### XYZ coordinates for complex 1

1

Charge 0, Multiplicity 1

|    |              |              |              |
|----|--------------|--------------|--------------|
| C  | 2.142167000  | -0.718186000 | 0.091858000  |
| C  | 3.260128000  | -1.579473000 | -0.064070000 |
| C  | 4.543848000  | -1.087499000 | -0.189745000 |
| C  | 4.795789000  | 0.294753000  | -0.157497000 |
| C  | 3.729456000  | 1.155184000  | 0.008567000  |
| C  | 2.406642000  | 0.683699000  | 0.129979000  |
| H  | 3.063511000  | -2.647126000 | -0.085479000 |
| H  | 5.369638000  | -1.782653000 | -0.314124000 |
| H  | 5.806024000  | 0.676437000  | -0.253362000 |
| H  | 3.898492000  | 2.229052000  | 0.051526000  |
| O  | 0.953122000  | -1.236631000 | 0.198860000  |
| C  | 1.368548000  | 1.672876000  | 0.346948000  |
| H  | 1.721749000  | 2.704363000  | 0.461929000  |
| N  | 0.106964000  | 1.448467000  | 0.414277000  |
| Mn | -0.773689000 | -0.372464000 | 0.074682000  |
| C  | -0.787298000 | 2.582837000  | 0.617703000  |

|   |              |              |              |
|---|--------------|--------------|--------------|
| H | -1.294834000 | 2.452482000  | 1.582439000  |
| H | -0.213065000 | 3.516119000  | 0.658761000  |
| C | -1.820014000 | 2.629578000  | -0.507566000 |
| H | -2.279816000 | 3.622859000  | -0.532749000 |
| H | -1.304135000 | 2.480918000  | -1.463219000 |
| C | -2.924768000 | 1.594840000  | -0.335412000 |
| H | -3.561510000 | 1.892533000  | 0.515509000  |
| H | -3.577195000 | 1.598118000  | -1.221657000 |
| N | -2.434297000 | 0.252640000  | -0.094962000 |
| C | -3.491740000 | -0.745313000 | 0.049619000  |
| H | -3.753985000 | -0.877594000 | 1.113874000  |
| H | -4.406937000 | -0.428039000 | -0.468548000 |
| C | -2.925435000 | -2.045563000 | -0.528097000 |
| H | -3.554343000 | -2.901079000 | -0.234088000 |
| H | -2.977464000 | -1.969829000 | -1.629959000 |
| O | -1.606804000 | -2.195636000 | -0.097229000 |
| O | -1.071134000 | -1.048757000 | 2.008270000  |
| H | -1.440068000 | -1.833714000 | 1.468796000  |
| O | -0.289754000 | -0.086764000 | -1.935308000 |
| H | -0.344695000 | -0.974927000 | -2.329144000 |
| H | 0.649609000  | 0.160869000  | -1.997140000 |
| H | -1.834792000 | -0.599037000 | 2.403906000  |

## 2a

Charge 0, Multiplicity 1

|   |              |              |              |
|---|--------------|--------------|--------------|
| C | -2.748832387 | -1.006570271 | -0.104260618 |
| C | -3.642842424 | -2.100458492 | 0.033225981  |
| C | -4.971348786 | -2.002016707 | -0.330735251 |
| C | -5.489589529 | -0.809836987 | -0.863200808 |
| C | -4.637613629 | 0.264731502  | -1.023936810 |
| C | -3.280118407 | 0.198485390  | -0.651770155 |
| H | -3.240679885 | -3.021765608 | 0.443736290  |
| H | -5.623297803 | -2.861960428 | -0.202981809 |
| H | -6.532796858 | -0.738579037 | -1.149848715 |
| H | -5.009758059 | 1.194413906  | -1.449189468 |

|    |              |              |              |
|----|--------------|--------------|--------------|
| O  | -1.510194080 | -1.147171607 | 0.275752677  |
| C  | -2.462971895 | 1.364071837  | -0.929171748 |
| H  | -2.964004852 | 2.153111099  | -1.502452216 |
| N  | -1.236758141 | 1.544657277  | -0.593723644 |
| Mn | -0.143248810 | 0.240855025  | 0.577418635  |
| C  | -0.584048167 | 2.762879926  | -1.063327706 |
| H  | 0.129828346  | 2.484978790  | -1.852353209 |
| H  | -1.321545565 | 3.441004696  | -1.509436827 |
| C  | 0.168742454  | 3.452228545  | 0.065755565  |
| H  | 0.456098929  | 4.455285079  | -0.266360839 |
| H  | -0.500499017 | 3.569359812  | 0.926816909  |
| C  | 1.429367547  | 2.709999773  | 0.484902576  |
| H  | 2.138783096  | 2.677618888  | -0.361096267 |
| H  | 1.928667448  | 3.276487722  | 1.283165927  |
| N  | 1.186330195  | 1.355185892  | 0.946182680  |
| C  | 2.328290465  | 0.789761060  | 1.663403064  |
| H  | 3.100399759  | 0.488695189  | 0.937603658  |
| H  | 2.779776556  | 1.546077060  | 2.320753393  |
| C  | 1.828367192  | -0.403495536 | 2.478856738  |
| H  | 2.662949565  | -1.082669134 | 2.708346623  |
| H  | 1.438552476  | -0.030023930 | 3.439137758  |
| O  | 0.808417733  | -1.076220051 | 1.780508402  |
| O  | -1.250675502 | 0.535170711  | 2.319623600  |
| H  | -0.883599532 | -0.280577186 | 2.720534104  |
| H  | -2.184140994 | 0.332966792  | 2.137178630  |
| C  | 2.106429199  | -0.727163096 | -1.219297937 |
| C  | 2.710607798  | -1.764211330 | -0.483750557 |
| C  | 2.870344713  | 0.177299779  | -1.945876821 |
| C  | 4.101663970  | -1.888766954 | -0.539486680 |
| C  | 4.259028054  | 0.051801690  | -1.973336358 |
| H  | 2.377221897  | 0.975576888  | -2.496282016 |
| C  | 4.869641448  | -0.989606436 | -1.276828500 |
| H  | 4.564886154  | -2.694987014 | 0.021308380  |
| H  | 4.853959281  | 0.756762096  | -2.544271513 |

|   |             |              |              |
|---|-------------|--------------|--------------|
| H | 5.949498006 | -1.099312817 | -1.299897453 |
| H | 1.389887749 | -1.994692893 | 0.948204666  |
| H | 0.259270393 | -1.548158314 | -1.086934303 |
| H | 0.295124268 | -0.151702417 | -1.965222483 |
| N | 0.679233396 | -0.616449690 | -1.142456109 |
| O | 1.950489659 | -2.602760416 | 0.244999012  |

**2b**

Charge 0, Multiplicity 1

|    |              |              |              |
|----|--------------|--------------|--------------|
| C  | -2.981532261 | -0.863540010 | -0.366458420 |
| C  | -3.935456275 | -1.908679894 | -0.479925664 |
| C  | -5.214855519 | -1.675856192 | -0.944646478 |
| C  | -5.620542906 | -0.388525640 | -1.333697063 |
| C  | -4.707784120 | 0.643795983  | -1.247551769 |
| C  | -3.398786405 | 0.439942619  | -0.767033426 |
| H  | -3.619877189 | -2.903378603 | -0.179788500 |
| H  | -5.915813228 | -2.503569845 | -1.010477716 |
| H  | -6.624923442 | -0.211957184 | -1.701910763 |
| H  | -4.991456993 | 1.647592836  | -1.556819358 |
| O  | -1.794425234 | -1.135939820 | 0.096834145  |
| C  | -2.506671882 | 1.582780794  | -0.780448070 |
| H  | -2.916267244 | 2.480815752  | -1.258307826 |
| N  | -1.309318925 | 1.634830139  | -0.318900202 |
| Mn | -0.375380348 | 0.094575616  | 0.694053534  |
| C  | -0.560252125 | 2.868184611  | -0.540443962 |
| H  | 0.187874328  | 2.674089276  | -1.322891792 |
| H  | -1.227482722 | 3.655628404  | -0.911397213 |
| C  | 0.153806955  | 3.317501605  | 0.726270374  |
| H  | 0.520564360  | 4.338354370  | 0.576670378  |
| H  | -0.562728145 | 3.343254016  | 1.556164766  |
| C  | 1.338006153  | 2.434771511  | 1.092209671  |
| H  | 2.099278427  | 2.484314143  | 0.292655657  |
| H  | 1.815619312  | 2.836905473  | 1.996589465  |
| N  | 0.984191365  | 1.045916716  | 1.320150654  |
| C  | 2.037133967  | 0.303551416  | 2.011360389  |

|   |              |              |              |
|---|--------------|--------------|--------------|
| H | 2.848986590  | 0.083065482  | 1.300431922  |
| H | 2.469637941  | 0.914656416  | 2.816101928  |
| C | 1.420593788  | -0.976543166 | 2.578154203  |
| H | 2.201910237  | -1.734584284 | 2.737630234  |
| H | 0.985163464  | -0.747476094 | 3.564287648  |
| O | 0.419896855  | -1.459467678 | 1.714551750  |
| O | -1.580463526 | 0.178230602  | 2.395053054  |
| H | -1.287393524 | -0.715095209 | 2.672103273  |
| H | -2.508127119 | 0.069503198  | 2.124969453  |
| C | 1.939192254  | -0.693102073 | -1.089756934 |
| C | 2.450952163  | -1.865278893 | -0.503316357 |
| C | 2.782297556  | 0.286683891  | -1.592904484 |
| C | 3.835729647  | -2.031921571 | -0.484922685 |
| C | 4.171874149  | 0.128387397  | -1.549751666 |
| H | 2.353130574  | 1.187577995  | -2.029749828 |
| C | 4.681089774  | -1.048778507 | -0.999423732 |
| H | 4.237691627  | -2.937505773 | -0.040596891 |
| H | 5.757189172  | -1.197144461 | -0.961563217 |
| H | 1.026704936  | -2.267416031 | 0.773911143  |
| H | 0.058256065  | -1.436808308 | -1.205187955 |
| H | 0.206776539  | 0.076802669  | -1.849862901 |
| N | 0.515412290  | -0.528504665 | -1.089117688 |
| O | 1.608457532  | -2.778799165 | 0.020995107  |
| C | 5.077330289  | 1.203239525  | -2.096908771 |
| H | 4.939426169  | 1.329106450  | -3.176240384 |
| H | 4.870078549  | 2.171392056  | -1.628826623 |
| H | 6.127809571  | 0.959916946  | -1.918454327 |

**2c**

Charge 0, Multiplicity 1

|   |              |              |              |
|---|--------------|--------------|--------------|
| C | -3.328786839 | -0.325196353 | -0.843363011 |
| C | -4.359102880 | -1.020188118 | -1.528642786 |
| C | -5.511807036 | -0.383821784 | -1.943947441 |
| C | -5.705390128 | 0.987736852  | -1.708774192 |
| C | -4.712953123 | 1.690774757  | -1.056207097 |

|    |              |              |              |
|----|--------------|--------------|--------------|
| C  | -3.528802610 | 1.067122965  | -0.612391959 |
| H  | -4.206235215 | -2.079897839 | -1.709538324 |
| H  | -6.278617150 | -0.954179606 | -2.460963668 |
| H  | -6.611100803 | 1.484036848  | -2.038862260 |
| H  | -4.832534481 | 2.756573721  | -0.873443034 |
| O  | -2.271190652 | -0.983731510 | -0.458905685 |
| C  | -2.535977189 | 1.916946172  | 0.013865502  |
| H  | -2.775908270 | 2.986743070  | 0.005280660  |
| N  | -1.423846111 | 1.551327027  | 0.545288050  |
| Mn | -0.797895044 | -0.414270643 | 0.712308032  |
| C  | -0.534201787 | 2.607793950  | 1.021130054  |
| H  | 0.278322362  | 2.721195047  | 0.288812242  |
| H  | -1.070883828 | 3.563107583  | 1.066600667  |
| C  | 0.067862220  | 2.261000815  | 2.374577069  |
| H  | 0.553747478  | 3.155173838  | 2.778712910  |
| H  | -0.734083676 | 1.979753691  | 3.068523709  |
| C  | 1.100374876  | 1.145385634  | 2.302075553  |
| H  | 1.941297322  | 1.458576543  | 1.657047645  |
| H  | 1.523918821  | 0.985397360  | 3.302938118  |
| N  | 0.562786884  | -0.108049527 | 1.806107351  |
| C  | 1.389999934  | -1.262663484 | 2.150739856  |
| H  | 2.291305208  | -1.264839990 | 1.515781133  |
| H  | 1.731314497  | -1.192903105 | 3.193183052  |
| C  | 0.548201171  | -2.518727069 | 1.933062265  |
| H  | 1.199879249  | -3.400352241 | 1.836138160  |
| H  | -0.088034985 | -2.671847152 | 2.817818579  |
| O  | -0.257643173 | -2.356323100 | 0.794823699  |
| O  | -2.216938871 | -0.837757437 | 2.178543358  |
| H  | -2.714554402 | -1.538066374 | 1.718164972  |
| H  | -2.839172998 | -0.097253253 | 2.279382845  |
| C  | 1.640491277  | -0.443187004 | -1.100672803 |
| C  | 2.089040434  | -1.783854919 | -1.096259464 |
| C  | 2.537452006  | 0.608867638  | -1.073492672 |
| C  | 3.470786262  | -2.021242774 | -1.129126134 |



|   |              |              |              |
|---|--------------|--------------|--------------|
| C | 3.913949453  | 0.351622936  | -1.065957188 |
| H | 2.176768497  | 1.633760142  | -1.075523125 |
| C | 4.372224889  | -0.967535511 | -1.110840414 |
| H | 3.810037034  | -3.051757787 | -1.144480741 |
| H | 5.441389949  | -1.151857472 | -1.117013796 |
| H | 0.500875791  | -2.618670659 | -0.274585841 |
| H | -0.240478780 | -0.950209190 | -1.657479454 |
| H | -0.012161552 | 0.675663566  | -1.519924062 |
| N | 0.223788529  | -0.225484013 | -1.103301755 |
| O | 1.210524179  | -2.783749619 | -1.076669323 |
| C | 4.906989191  | 1.445070352  | -1.019534055 |
| O | 6.110138226  | 1.291335895  | -1.054565060 |
| O | 4.346181430  | 2.664646637  | -0.924739359 |
| H | 5.072512130  | 3.313276654  | -0.906281128 |

### 3a

Charge 0, Multiplicity 3

|    |              |              |              |
|----|--------------|--------------|--------------|
| C  | -2.785494316 | -0.952391516 | 0.030123415  |
| C  | -3.710249021 | -2.013576584 | 0.200916430  |
| C  | -4.992288859 | -1.946200149 | -0.308380159 |
| C  | -5.427363047 | -0.818988049 | -1.024739042 |
| C  | -4.542942761 | 0.223847268  | -1.213353689 |
| C  | -3.230793267 | 0.186850370  | -0.699528401 |
| H  | -3.371722164 | -2.884299117 | 0.754370744  |
| H  | -5.671864103 | -2.779376498 | -0.151701359 |
| H  | -6.433820603 | -0.771275311 | -1.424944683 |
| H  | -4.851158875 | 1.103455746  | -1.774173092 |
| O  | -1.591119569 | -1.064735317 | 0.546747521  |
| C  | -2.379575149 | 1.319746363  | -0.998420412 |
| H  | -2.829749939 | 2.071946422  | -1.656505768 |
| N  | -1.173091238 | 1.514275095  | -0.598605833 |
| Mn | -0.136208107 | 0.241228095  | 0.639257230  |
| C  | -0.477422127 | 2.687115503  | -1.122414579 |
| H  | 0.230775786  | 2.345344260  | -1.891066229 |
| H  | -1.190331833 | 3.364757662  | -1.606784274 |

|   |              |              |              |
|---|--------------|--------------|--------------|
| C | 0.293176367  | 3.405167754  | -0.024923719 |
| H | 0.609702151  | 4.383765186  | -0.400026250 |
| H | -0.370953781 | 3.582694550  | 0.830385997  |
| C | 1.531128861  | 2.644255321  | 0.424630875  |
| H | 2.239528390  | 2.558667780  | -0.418288686 |
| H | 2.045263717  | 3.223387431  | 1.203935393  |
| N | 1.247863454  | 1.312753285  | 0.929101897  |
| C | 2.378250089  | 0.741415427  | 1.659105616  |
| H | 3.123478767  | 0.371447503  | 0.937613183  |
| H | 2.867605691  | 1.507857762  | 2.275196524  |
| C | 1.856120952  | -0.384654709 | 2.543377203  |
| H | 2.663836996  | -1.062817050 | 2.841605626  |
| H | 1.402129735  | 0.038067424  | 3.445278860  |
| O | 0.841236248  | -1.100811976 | 1.853852369  |
| O | -1.228061642 | 0.839615378  | 2.322512907  |
| H | -1.817923350 | 0.070741473  | 2.428158912  |
| H | -1.807758384 | 1.590832226  | 2.111621486  |
| C | 2.010398345  | -0.814927143 | -1.210381830 |
| C | 2.685718475  | -1.824533832 | -0.473643272 |
| C | 2.681474473  | 0.097268599  | -2.008967979 |
| C | 4.087228544  | -1.871766077 | -0.624415395 |
| C | 4.072501012  | 0.035727402  | -2.121753643 |
| H | 2.117382109  | 0.855910333  | -2.548829846 |
| C | 4.764031957  | -0.958027783 | -1.429180747 |
| H | 4.627768816  | -2.640147847 | -0.078491274 |
| H | 4.600566459  | 0.746942683  | -2.747934902 |
| H | 5.845760743  | -1.020627864 | -1.513060633 |
| H | 1.306565616  | -1.817144930 | 1.219415944  |
| H | 0.252327588  | -1.720473243 | -0.850257132 |
| H | 0.108312529  | -0.416563568 | -1.861574652 |
| N | 0.583694148  | -0.767880110 | -1.029950909 |
| O | 2.005045717  | -2.634794161 | 0.302201485  |

**3b**

Charge 0, Multiplicity 3

|    |              |              |              |
|----|--------------|--------------|--------------|
| C  | -3.004802302 | -0.828840271 | -0.312642681 |
| C  | -3.983633630 | -1.846023720 | -0.448775116 |
| C  | -5.219539266 | -1.591131740 | -1.009410365 |
| C  | -5.551791669 | -0.308217701 | -1.474809055 |
| C  | -4.612079769 | 0.696836477  | -1.365139187 |
| C  | -3.344708195 | 0.469141561  | -0.790473862 |
| H  | -3.723276307 | -2.836972150 | -0.089307128 |
| H  | -5.943330974 | -2.397257077 | -1.092131882 |
| H  | -6.522438742 | -0.114466860 | -1.917293841 |
| H  | -4.839544492 | 1.696499397  | -1.729115237 |
| O  | -1.859673318 | -1.124863082 | 0.241344514  |
| C  | -2.424924051 | 1.587872537  | -0.770894833 |
| H  | -2.790470170 | 2.491546938  | -1.272315677 |
| N  | -1.246612479 | 1.618333567  | -0.257034090 |
| Mn | -0.370838420 | 0.045722502  | 0.737636043  |
| C  | -0.463335428 | 2.835372447  | -0.456048657 |
| H  | 0.288108966  | 2.631522258  | -1.232294531 |
| H  | -1.107003350 | 3.643428223  | -0.823163786 |
| C  | 0.248412734  | 3.248377298  | 0.823328361  |
| H  | 0.639033917  | 4.263044509  | 0.695441036  |
| H  | -0.473481344 | 3.277554544  | 1.648973459  |
| C  | 1.409427089  | 2.332413814  | 1.179710717  |
| H  | 2.178513194  | 2.383224355  | 0.388202313  |
| H  | 1.886033754  | 2.700284079  | 2.098773062  |
| N  | 1.024015128  | 0.945302129  | 1.364666632  |
| C  | 2.061223703  | 0.165686984  | 2.038001289  |
| H  | 2.860963459  | -0.068715782 | 1.317970444  |
| H  | 2.513315173  | 0.748193658  | 2.852274897  |
| C  | 1.424103291  | -1.102257159 | 2.595732413  |
| H  | 2.177973963  | -1.875563453 | 2.782259455  |
| H  | 0.916974742  | -0.873392762 | 3.538617260  |
| O  | 0.440677117  | -1.582728934 | 1.690913402  |
| O  | -1.590119953 | 0.313544929  | 2.420785885  |
| H  | -2.190230766 | -0.446901829 | 2.309850225  |

|   |              |              |              |
|---|--------------|--------------|--------------|
| H | -2.146265133 | 1.104326772  | 2.317442860  |
| C | 1.888618785  | -0.705374223 | -1.114624561 |
| C | 2.444069155  | -1.895265251 | -0.574599178 |
| C | 2.671298395  | 0.321915454  | -1.612360214 |
| C | 3.847844631  | -1.986192719 | -0.607752133 |
| C | 4.068808413  | 0.222858236  | -1.614734103 |
| H | 2.192172318  | 1.216908702  | -2.009792437 |
| C | 4.634189852  | -0.950082187 | -1.111397109 |
| H | 4.307398030  | -2.886365554 | -0.208596380 |
| H | 5.717110875  | -1.055009569 | -1.106258268 |
| H | 0.926028964  | -2.177520458 | 0.946416576  |
| H | 0.066895413  | -1.554753450 | -1.123675608 |
| H | 0.078761154  | -0.052039291 | -1.821823386 |
| N | 0.455134239  | -0.609205783 | -1.054599985 |
| O | 1.654114416  | -2.816185538 | -0.067520371 |
| C | 4.915788350  | 1.349075483  | -2.153224872 |
| H | 4.723961068  | 1.525850847  | -3.217575477 |
| H | 4.711687331  | 2.289960040  | -1.629544716 |
| H | 5.980488742  | 1.127410541  | -2.038973916 |

### 3c

Charge 0, Multiplicity 3

|   |              |              |              |
|---|--------------|--------------|--------------|
| C | -3.354225448 | -0.428771687 | -0.707036897 |
| C | -4.399204991 | -1.203478183 | -1.269241686 |
| C | -5.545355286 | -0.616898432 | -1.769122095 |
| C | -5.714222096 | 0.777346033  | -1.743591939 |
| C | -4.705046686 | 1.554713762  | -1.212077314 |
| C | -3.526500689 | 0.984292967  | -0.689252838 |
| H | -4.265108830 | -2.280778285 | -1.287399345 |
| H | -6.325611264 | -1.246412980 | -2.187911912 |
| H | -6.615294532 | 1.232526839  | -2.138818551 |
| H | -4.806476206 | 2.637533711  | -1.190699611 |
| O | -2.301187593 | -1.039297767 | -0.231533568 |
| C | -2.515356210 | 1.899553703  | -0.202475387 |
| H | -2.746641593 | 2.960522337  | -0.351143501 |

|    |              |              |              |
|----|--------------|--------------|--------------|
| N  | -1.393143247 | 1.599286361  | 0.349910518  |
| Mn | -0.779061625 | -0.319909343 | 0.748146561  |
| C  | -0.487490782 | 2.702811429  | 0.661707574  |
| H  | 0.310072997  | 2.712049276  | -0.095350861 |
| H  | -1.019040862 | 3.658934704  | 0.590767660  |
| C  | 0.137056907  | 2.533182604  | 2.038380180  |
| H  | 0.633183862  | 3.468839948  | 2.315628841  |
| H  | -0.653370916 | 2.351351480  | 2.777218513  |
| C  | 1.165883844  | 1.414395005  | 2.092114425  |
| H  | 2.005445775  | 1.649189363  | 1.413276854  |
| H  | 1.590758141  | 1.366180608  | 3.103957947  |
| N  | 0.628962615  | 0.112032645  | 1.738943646  |
| C  | 1.509160067  | -0.981900557 | 2.145195136  |
| H  | 2.350525434  | -1.052524552 | 1.437917993  |
| H  | 1.934710123  | -0.787868193 | 3.138655570  |
| C  | 0.696660790  | -2.270272000 | 2.175053434  |
| H  | 1.341058976  | -3.154202798 | 2.130540102  |
| H  | 0.102801147  | -2.310910167 | 3.092095381  |
| O  | -0.226675720 | -2.279598749 | 1.088955231  |
| O  | -2.119192954 | -0.508390108 | 2.343131770  |
| H  | -2.804007582 | -1.076421138 | 1.945202650  |
| H  | -2.557182379 | 0.337722508  | 2.536890019  |
| C  | 1.587686796  | -0.585992364 | -1.120373013 |
| C  | 2.017357555  | -1.948419518 | -1.037800195 |
| C  | 2.472556883  | 0.467803801  | -1.143027620 |
| C  | 3.420850451  | -2.160646583 | -1.035394556 |
| C  | 3.855486480  | 0.223209080  | -1.099030766 |
| H  | 2.105122131  | 1.489554050  | -1.196360220 |
| C  | 4.310839799  | -1.101559174 | -1.057784574 |
| H  | 3.774832988  | -3.186033338 | -0.989444507 |
| H  | 5.381536298  | -1.280859243 | -1.031683965 |
| H  | 0.268896656  | -2.596193855 | 0.244580433  |
| H  | -0.279990858 | -1.198025541 | -1.549329912 |
| H  | -0.104852238 | 0.444432158  | -1.634436960 |

|   |             |              |              |
|---|-------------|--------------|--------------|
| N | 0.164743461 | -0.387331287 | -1.108754927 |
| O | 1.143916109 | -2.898456725 | -0.956004210 |
| C | 4.835724891 | 1.315251002  | -1.086237376 |
| O | 6.044656246 | 1.178882025  | -1.090263357 |
| O | 4.268777616 | 2.541456819  | -1.057448017 |
| H | 4.997709222 | 3.186724444  | -1.053236825 |

**a**

Charge 0, Multiplicity 1

|   |              |              |              |
|---|--------------|--------------|--------------|
| C | 1.850047000  | -0.826887000 | 0.013029000  |
| C | 0.588885000  | -1.423761000 | 0.012945000  |
| C | -0.562517000 | -0.642445000 | -0.004406000 |
| C | -0.440436000 | 0.756982000  | -0.001735000 |
| C | 0.813876000  | 1.357770000  | -0.021227000 |
| C | 1.958169000  | 0.561237000  | -0.017705000 |
| H | 2.740759000  | -1.446342000 | 0.026284000  |
| H | 0.490683000  | -2.506367000 | 0.020577000  |
| H | 0.877215000  | 2.441309000  | -0.021652000 |
| H | 2.936498000  | 1.031763000  | -0.028798000 |
| O | -1.562296000 | 1.523374000  | 0.027073000  |
| H | -2.297123000 | 0.912416000  | 0.231430000  |
| N | -1.895701000 | -1.150932000 | 0.029562000  |
| H | -2.312225000 | -1.150377000 | -0.900951000 |
| H | -1.915675000 | -2.110249000 | 0.364187000  |

**b**

Charge 0, Multiplicity 1

|   |              |              |              |
|---|--------------|--------------|--------------|
| C | -1.590582000 | 0.058637000  | 0.002336000  |
| C | -0.602947000 | 1.051659000  | 0.004436000  |
| C | 0.748585000  | 0.729053000  | -0.007703000 |
| C | 1.131281000  | -0.623294000 | -0.001406000 |
| C | 0.166844000  | -1.620865000 | -0.022882000 |
| C | -1.185298000 | -1.275042000 | -0.025095000 |
| H | -0.892257000 | 2.101254000  | 0.008293000  |
| H | 0.482885000  | -2.659362000 | -0.019088000 |
| H | -1.934900000 | -2.062057000 | -0.037240000 |

|   |              |              |              |
|---|--------------|--------------|--------------|
| O | 2.454086000  | -0.944440000 | 0.032009000  |
| H | 2.923439000  | -0.121817000 | 0.269727000  |
| N | 1.810064000  | 1.679570000  | 0.034535000  |
| H | 2.245823000  | 1.785588000  | -0.880984000 |
| H | 1.472394000  | 2.596531000  | 0.313330000  |
| C | -3.051065000 | 0.436935000  | 0.015506000  |
| H | -3.301779000 | 1.024220000  | 0.905095000  |
| H | -3.313130000 | 1.044045000  | -0.857391000 |
| H | -3.686510000 | -0.452365000 | 0.009285000  |

**c**

Charge 0, Multiplicity 1

|   |              |              |              |
|---|--------------|--------------|--------------|
| C | -0.920593000 | -0.150287000 | -0.004422000 |
| C | -0.046871000 | 0.944326000  | -0.007424000 |
| C | 1.324341000  | 0.741655000  | -0.013427000 |
| C | 1.825398000  | -0.575004000 | 0.003812000  |
| C | 0.960035000  | -1.667812000 | -0.016475000 |
| C | -0.410419000 | -1.450424000 | -0.022525000 |
| H | -0.439394000 | 1.956535000  | -0.010435000 |
| H | 1.375619000  | -2.669656000 | -0.006639000 |
| H | -1.102072000 | -2.286188000 | -0.029792000 |
| O | 3.158965000  | -0.771654000 | 0.047949000  |
| H | 3.555418000  | 0.106584000  | 0.221080000  |
| N | 2.307788000  | 1.773943000  | 0.017315000  |
| H | 2.651763000  | 1.981630000  | -0.919647000 |
| H | 1.927483000  | 2.637282000  | 0.395007000  |
| C | -2.390176000 | 0.026049000  | 0.003495000  |
| O | -3.195729000 | -0.880754000 | -0.015638000 |
| O | -2.767324000 | 1.316615000  | 0.034521000  |
| H | -3.740921000 | 1.331532000  | 0.036367000  |

**4a**

Charge 0, Multiplicity 2

|   |              |              |              |
|---|--------------|--------------|--------------|
| C | -0.638263000 | -0.629266000 | -0.000001000 |
| C | -0.499161000 | 0.837355000  | -0.000133000 |
| C | 0.501957000  | -1.460148000 | -0.000205000 |

|   |              |              |              |
|---|--------------|--------------|--------------|
| C | 0.845406000  | 1.356871000  | 0.000164000  |
| C | 1.755981000  | -0.893031000 | -0.000074000 |
| H | 0.375433000  | -2.538690000 | -0.000593000 |
| C | 1.927487000  | 0.521004000  | 0.000184000  |
| H | 0.955917000  | 2.436730000  | 0.000293000  |
| H | 2.632061000  | -1.533205000 | -0.000245000 |
| H | 2.932991000  | 0.929969000  | 0.000399000  |
| N | -1.895038000 | -1.087537000 | 0.000049000  |
| O | -1.528905000 | 1.549543000  | -0.000235000 |
| H | -2.641790000 | -0.403115000 | 0.000710000  |
| H | -2.118547000 | -2.071989000 | 0.001370000  |

#### 4b

Charge 0, Multiplicity 2

|   |              |              |              |
|---|--------------|--------------|--------------|
| C | -0.791340000 | -0.758732000 | 0.000053000  |
| C | -1.236526000 | 0.644973000  | -0.000330000 |
| C | 0.577353000  | -1.077246000 | 0.000382000  |
| C | -0.198445000 | 1.641941000  | 0.000261000  |
| C | 1.533218000  | -0.077087000 | 0.000543000  |
| H | 0.879871000  | -2.122025000 | 0.000293000  |
| C | 1.123263000  | 1.290073000  | 0.000636000  |
| H | -0.511714000 | 2.681389000  | 0.000531000  |
| H | 1.890159000  | 2.060083000  | 0.001244000  |
| N | -1.771993000 | -1.670891000 | -0.000281000 |
| O | -2.462973000 | 0.901750000  | -0.000640000 |
| H | -2.725919000 | -1.331884000 | 0.001003000  |
| H | -1.593412000 | -2.663973000 | 0.002717000  |
| C | 2.997886000  | -0.425679000 | -0.000643000 |
| H | 3.255903000  | -1.034567000 | 0.871987000  |
| H | 3.260342000  | -1.008101000 | -0.890001000 |
| H | 3.620052000  | 0.471859000  | 0.013899000  |

#### 4c

Charge 0, Multiplicity 2

|   |             |              |              |
|---|-------------|--------------|--------------|
| C | 1.361348000 | 0.780468000  | -0.000081000 |
| C | 1.942325000 | -0.579947000 | 0.000104000  |



|   |              |              |              |
|---|--------------|--------------|--------------|
| C | -0.034225000 | 0.970232000  | -0.000185000 |
| C | 1.004427000  | -1.679533000 | 0.000124000  |
| C | -0.866751000 | -0.130027000 | -0.000097000 |
| H | -0.442346000 | 1.975391000  | -0.000305000 |
| C | -0.339206000 | -1.458756000 | 0.000075000  |
| H | 1.419296000  | -2.682007000 | 0.000197000  |
| H | -1.043792000 | -2.283727000 | 0.000095000  |
| N | 2.245158000  | 1.779998000  | -0.000351000 |
| O | 3.179807000  | -0.712064000 | 0.000280000  |
| H | 3.229079000  | 1.535790000  | -0.000270000 |
| H | 1.972364000  | 2.752834000  | -0.000252000 |
| C | -2.342136000 | 0.018809000  | -0.000049000 |
| O | -3.121024000 | -0.910381000 | -0.000581000 |
| O | -2.744639000 | 1.299469000  | 0.000650000  |
| H | -3.718552000 | 1.298080000  | 0.000850000  |

### XYZ coordinates for complex 4

#### A

Charge 0, Multiplicity 1

|    |              |              |              |
|----|--------------|--------------|--------------|
| Mn | 0.202263000  | -0.607052000 | -0.243133000 |
| S  | 3.664727000  | 2.068496000  | -1.855322000 |
| O  | -1.335808000 | -0.335164000 | -1.251777000 |
| O  | 0.275757000  | -2.361177000 | -0.395448000 |
| N  | 1.810064000  | -1.092662000 | 1.108100000  |
| H  | 1.315622000  | -1.537652000 | 1.886687000  |
| N  | -0.298110000 | 0.767886000  | 1.080987000  |

|   |              |              |              |
|---|--------------|--------------|--------------|
| N | 1.493153000  | 0.424550000  | -1.216368000 |
| C | 2.654700000  | -0.037788000 | 1.674796000  |
| H | 3.135408000  | 0.501186000  | 0.852570000  |
| H | 3.445691000  | -0.476653000 | 2.298963000  |
| C | 1.784528000  | 0.894166000  | 2.507014000  |
| H | 1.307559000  | 0.331614000  | 3.321736000  |
| H | 2.423906000  | 1.648950000  | 2.976285000  |
| C | 0.720205000  | 1.628715000  | 1.697353000  |
| H | 1.207476000  | 2.172227000  | 0.878047000  |
| H | 0.223296000  | 2.367288000  | 2.338330000  |
| C | -1.544212000 | 1.098646000  | 1.248237000  |
| H | -1.764023000 | 1.868509000  | 1.996086000  |
| C | -2.665604000 | 0.610661000  | 0.510351000  |
| C | -3.966005000 | 0.941309000  | 0.963337000  |
| H | -4.065220000 | 1.468531000  | 1.909589000  |
| C | -5.080915000 | 0.604703000  | 0.237572000  |
| H | -6.072891000 | 0.849426000  | 0.599646000  |
| C | -4.914648000 | -0.050994000 | -1.002168000 |
| H | -5.791227000 | -0.311429000 | -1.588327000 |
| C | -3.666647000 | -0.358245000 | -1.488989000 |
| H | -3.528753000 | -0.850116000 | -2.445487000 |
| C | -2.496459000 | -0.050532000 | -0.745400000 |
| C | 2.511996000  | -2.154044000 | 0.372230000  |
| H | 3.293932000  | -2.634157000 | 0.975621000  |
| H | 2.968089000  | -1.692299000 | -0.508765000 |
| C | 1.396256000  | -3.117212000 | -0.023046000 |
| H | 1.700765000  | -3.763398000 | -0.853831000 |
| H | 1.137868000  | -3.765081000 | 0.829232000  |
| C | 2.402630000  | 1.119903000  | -1.506977000 |

**B**

Charge 0, Multiplicity 1

|    |              |              |              |
|----|--------------|--------------|--------------|
| Mn | 0.106325000  | -0.483178000 | -0.590117000 |
| S  | -0.476674000 | -5.010295000 | 0.233727000  |
| O  | 1.865672000  | -0.374224000 | -1.233892000 |

|   |              |              |              |
|---|--------------|--------------|--------------|
| O | -0.869722000 | -0.001181000 | -2.053232000 |
| N | -1.904474000 | -0.743438000 | 0.106759000  |
| H | -2.225005000 | 0.219030000  | 0.246197000  |
| N | 0.784728000  | -0.575991000 | 1.329283000  |
| N | 0.062753000  | -2.453923000 | -0.783038000 |
| C | -2.210701000 | -1.493201000 | 1.338518000  |
| H | -1.996326000 | -2.550461000 | 1.147706000  |
| H | -3.282074000 | -1.404902000 | 1.564060000  |
| C | -1.375378000 | -1.008608000 | 2.511419000  |
| H | -1.500640000 | 0.072465000  | 2.655232000  |
| H | -1.744610000 | -1.498803000 | 3.418514000  |
| C | 0.100123000  | -1.358889000 | 2.360599000  |
| H | 0.191665000  | -2.417160000 | 2.080839000  |
| H | 0.616818000  | -1.221308000 | 3.318646000  |
| C | 1.939725000  | -0.086656000 | 1.638105000  |
| H | 2.263879000  | -0.164694000 | 2.682517000  |
| C | 2.894942000  | 0.509602000  | 0.740494000  |
| C | 4.003561000  | 1.190149000  | 1.295385000  |
| H | 4.040949000  | 1.325854000  | 2.374175000  |
| C | 5.016269000  | 1.674298000  | 0.501542000  |
| H | 5.854285000  | 2.206331000  | 0.937035000  |
| C | 4.959246000  | 1.443586000  | -0.888098000 |
| H | 5.762437000  | 1.807091000  | -1.522605000 |
| C | 3.911687000  | 0.756085000  | -1.458211000 |
| H | 3.869159000  | 0.559597000  | -2.524075000 |
| C | 2.833505000  | 0.278967000  | -0.668208000 |
| C | -2.635333000 | -1.314619000 | -1.050004000 |
| H | -3.697099000 | -1.046025000 | -0.992316000 |
| H | -2.553493000 | -2.400508000 | -0.973373000 |
| C | -1.974419000 | -0.819652000 | -2.356004000 |
| H | -1.643943000 | -1.679100000 | -2.948840000 |
| H | -2.684453000 | -0.234938000 | -2.954393000 |
| C | -0.139949000 | -3.540493000 | -0.371957000 |
| N | 0.227154000  | 1.660742000  | -0.390444000 |

|   |              |             |              |
|---|--------------|-------------|--------------|
| C | -0.957013000 | 2.301485000 | 0.097924000  |
| C | -1.985757000 | 2.613752000 | -0.808191000 |
| C | -1.117732000 | 2.549466000 | 1.458196000  |
| C | -3.152914000 | 3.203568000 | -0.319900000 |
| C | -2.291662000 | 3.126940000 | 1.935238000  |
| H | -0.308259000 | 2.292646000 | 2.138508000  |
| C | -3.306479000 | 3.457239000 | 1.039585000  |
| H | -3.930039000 | 3.449516000 | -1.035960000 |
| H | -2.406164000 | 3.322858000 | 2.995842000  |
| H | -4.223966000 | 3.911011000 | 1.399751000  |
| O | -1.843136000 | 2.399474000 | -2.134334000 |
| H | -1.380738000 | 1.521511000 | -2.265624000 |
| H | 1.036860000  | 1.915190000 | 0.175961000  |
| H | 0.425445000  | 1.956576000 | -1.349359000 |

C

Charge 0, Multiplicity 3

|    |              |              |              |
|----|--------------|--------------|--------------|
| Mn | 0.281178000  | -0.343947000 | -0.441329000 |
| S  | 2.135465000  | -4.568448000 | -0.585899000 |
| O  | 1.328176000  | 0.912258000  | -1.206741000 |
| O  | -0.957905000 | -0.236609000 | -2.076441000 |
| N  | -1.313474000 | -1.506071000 | 0.243287000  |
| H  | -2.014813000 | -0.840484000 | 0.589950000  |
| N  | 1.425759000  | -0.438236000 | 1.243812000  |
| N  | 1.075527000  | -2.012069000 | -0.976631000 |
| C  | -1.019020000 | -2.467074000 | 1.325136000  |
| H  | -0.450069000 | -3.295610000 | 0.889077000  |
| H  | -1.962883000 | -2.876908000 | 1.706725000  |
| C  | -0.224159000 | -1.839733000 | 2.467528000  |
| H  | -0.709716000 | -0.913103000 | 2.801492000  |
| H  | -0.256204000 | -2.533091000 | 3.314627000  |
| C  | 1.248258000  | -1.570920000 | 2.149534000  |
| H  | 1.686928000  | -2.458647000 | 1.675805000  |
| H  | 1.799009000  | -1.383769000 | 3.080023000  |
| C  | 2.331286000  | 0.426571000  | 1.514525000  |

|   |              |              |              |
|---|--------------|--------------|--------------|
| H | 2.908839000  | 0.312416000  | 2.439544000  |
| C | 2.680027000  | 1.568379000  | 0.690559000  |
| C | 3.593220000  | 2.502083000  | 1.212219000  |
| H | 3.984692000  | 2.343598000  | 2.214419000  |
| C | 3.993870000  | 3.601958000  | 0.478024000  |
| H | 4.693872000  | 4.316429000  | 0.896172000  |
| C | 3.487614000  | 3.776309000  | -0.816952000 |
| H | 3.794655000  | 4.635798000  | -1.404811000 |
| C | 2.600600000  | 2.864341000  | -1.360421000 |
| H | 2.203082000  | 2.979305000  | -2.362989000 |
| C | 2.176162000  | 1.743696000  | -0.622942000 |
| C | -1.874856000 | -2.170981000 | -0.955582000 |
| H | -2.828279000 | -2.659256000 | -0.716094000 |
| H | -1.157909000 | -2.934651000 | -1.261833000 |
| C | -2.060546000 | -1.132652000 | -2.056891000 |
| H | -2.147454000 | -1.638317000 | -3.024088000 |
| H | -2.981957000 | -0.562080000 | -1.886409000 |
| C | 1.545980000  | -3.088605000 | -0.833702000 |
| N | -0.735581000 | 1.298188000  | 0.431900000  |
| C | -2.169214000 | 1.362325000  | 0.573547000  |
| C | -2.851378000 | 1.688964000  | -0.632408000 |
| C | -2.824276000 | 1.130385000  | 1.777056000  |
| C | -4.259769000 | 1.773248000  | -0.533506000 |
| C | -4.215271000 | 1.205804000  | 1.830162000  |
| H | -2.248731000 | 0.915154000  | 2.676864000  |
| C | -4.916553000 | 1.532976000  | 0.666551000  |
| H | -4.809204000 | 2.034746000  | -1.432360000 |
| H | -4.736931000 | 1.029505000  | 2.763989000  |
| H | -6.000227000 | 1.603344000  | 0.699794000  |
| O | -2.173011000 | 1.886017000  | -1.723098000 |
| H | -1.387860000 | 0.733988000  | -2.038838000 |
| H | -0.261384000 | 1.561679000  | 1.296031000  |
| H | -0.509906000 | 1.995340000  | -0.290433000 |
